# Supplementary material for: Genomic comparisons of a bacterial lineage that inhabits both marine and terrestrial deep subsurface systems
Source: PeerJ. 2017 Apr 6;5:e3134. doi: 10.7717/peerj.3134 (PMC5385130; doi:10.7717/peerj.3134)
Supplement: Table S2 [file peerj-05-3134-s005.xlsx]

## Sheet: Sheet1
Supplementary Table 2. Metagenomes from the IMG database used in Figure 7A.
IMG Genome ID	Environment	Geographic Location	Latitude, Longitude	Genome Size	Gene Count	Num Desulf Genes Mapped	Frequency Desulf Genes Mapped	Num JdF Genes Mapped	Frequency JdF Genes Mapped
2004175001	Marine Sediment	Eel River Basin, California, USA	40.785, -124.596	2116258	2386	2	0.00084	1	0.00042
2006543007	Terrestrial Subsurface	DOE Field Research Center Area 3 Well FW106, Oakridge, TN	36.12, -84.25	9554544	12420	6	0.00048	6	0.00048
2007309000	Hot Spring	Bath Hot Spring, Yellowstone National Park	44.560318, -110.8338344	10490501	14864	0	0	9	0.00061
2007309001	Hot Spring	Bath Hot Spring, Yellowstone National Park	44.560318, -110.8338344	20451936	29804	20	0.00067	19	0.00064
2007427000	Terrestrial Subsurface	DOE Field Research Center Area 3 Well FW106, Oakridge, TN	36.12, -84.25	106573620	170521	22	0.00013	17	0.0001
2008193001	Seawater	Arthur Harbor, Palmer Station, Antarctic Peninsula	-64.766667, -64.05	12733012	21193	0	0	12	0.00057
2009439000	Hot Spring	Bison Pool / Rosette Geyser, Yellowstone National Park	44.5696298, -110.8651817	31802272	51132	23	0.00045	19	0.00037
2009439003	Hot Spring	Bison Pool, Yellowstone National Park	44.6, -110.9	26884788	40864	18	0.00044	14	0.00034
2010170001	Hot Spring	Bison Pool / Rosette Geyser, Yellowstone National Park	44.6, -110.9	28728092	43764	25	0.00057	23	0.00053
2010170002	Hot Spring	Bison Pool / Rosette Geyser, Yellowstone National Park	44.6, -110.9	58029430	84577	26	0.00031	25	0.0003
2010170003	Hot Spring	Bison Pool / Rosette Geyser, Yellowstone National Park	44.6, -110.9	50211307	74755	24	0.00032	27	0.00036
2010170004	Hot Spring	Yellowstone National Park, Montana, USA	44.6100594, -110.4388217	4270923	6949	1	0.00014	0	0
2013515000	Hot Spring	Yellowstone National Park, WY	44.733519, -110.404033	38275783	55998	20	0.00036	23	0.00041
2013515001	Hot Spring	Yellowstone National Park, WY	44.733519, -110.7	21158971	31788	4	0.00013	5	0.00016
2013515002	Hot Spring	Yellowstone National Park, WY	44.286, -110.8785	18087467	27144	9	0.00033	7	0.00026
2013843003	Hot Spring	Yellowstone National Park, WY	44.733519, -110.333	17963232	26307	6	0.00023	4	0.00015
2013954001	Hot Spring	Yellowstone National Park, WY	44.733473, -110.70007	16164785	24189	4	0.00017	6	0.00025
2014031002	Hot Spring	Yellowstone National Park, WY	44.6533633, -110.4776669	9888965	13855	0	0	0	0
2014031003	Hot Spring	Yellowstone National Park, WY	44.7242925, -110.7056131	12778632	20229	4	0.0002	4	0.0002
2014031004	Hot Spring	Yellowstone National Park, WY	44.7318889, -110.7110833	18602353	27451	4	0.00015	6	0.00022
2014031005	Hot Spring	Yellowstone National Park, WY	44.90485, -110.404033	16071904	23346	16	0.00069	17	0.00073
2014031006	Hot Spring	Yellowstone National Park, WY	44.710087, -110.7413395	31857986	43900	23	0.00052	20	0.00046
2014031007	Hot Spring	Yellowstone National Park, WY	44.5340836, -110.7978895	28556353	44644	12	0.00027	14	0.00031
2014613002	Seawater	North Pacific Ocean at depths of 10m to 4000m at the Hawaii open-ocean time-series station	22.45, -158	7482595	11252	7	0.00062	8	0.00071
2014613003	Seawater	North Pacific Ocean at depths of 10m to 4000m at the Hawaii open-ocean time-series station	22.45, -158	6091158	7696	7	0.00091	8	0.00104
2014642000	Seawater	Hawaii Ocean Time Series, North Pacific Ocean	22.45, -158	10828386	16067	8	0.0005	6	0.00037
2014642001	Seawater	Hawaii Ocean Time Series, North Pacific Ocean	22.45, -158	7829659	11155	4	0.00036	4	0.00036
2014642002	Seawater	Hawaii Ocean Time Series, North Pacific Ocean	22.45, -158	8764642	13784	13	0.00094	11	0.0008
2014642003	Seawater	Hawaii Ocean Time Series, North Pacific Ocean	22.45, -158	11811597	16686	12	0.00072	8	0.00048
2014642004	Seawater	Hawaii Ocean Time Series, North Pacific Ocean	22.45, -158	11028821	16740	12	0.00072	14	0.00084
2015219000	Hot Spring	Yellowstone National Park, WY	44.7230812, -110.7040247	17628346	26749	0	0	0	0
2015219001	Hot Spring	Yellowstone National Park, WY	44.7523206, -110.7253926	5509727	10385	3	0.00029	4	0.00039
2015219002	Hot Spring	Yellowstone National Park, WY	44.538694, -110.797972	45311652	76046	47	0.00062	34	0.00045
2015391001	Hot Spring	Yellowstone National Park, WY	44.9694208, -110.7098244	2923224	3891	5	0.00129	6	0.00154
2016842001	Hot Spring	Yellowstone National Park, WY	44.7242925, -110.7056131	16091989	23521	6	0.00026	5	0.00021
2016842002	Hot Spring	Yellowstone National Park, WY	44.7523206, -110.7253926	4181675	6199	1	0.00016	2	0.00032
2016842003	Hot Spring	Yellowstone National Park, WY	44.533365, -110.849887	36317514	55048	25	0.00045	28	0.00051
2016842004	Hot Spring	Yellowstone National Park, WY	44.7649458, -110.4303679	38709330	62242	37	0.00059	39	0.00063
2016842005	Hot Spring	Yellowstone National Park, WY	44.733519, -110.404033	24421805	38984	27	0.00069	21	0.00054
2016842008	Hot Spring	Yellowstone National Park, WY	44.96507, -110.71215	41493403	57652	40	0.00069	30	0.00052
2022920002	Hot Spring	Yellowstone National Park, WY	44.7242925, -110.7056131	17214260	31080	8	0.00026	8	0.00026
2022920003	Hot Spring	Yellowstone National Park, WY	44.96507, -110.71215	31324257	50616	27	0.00053	35	0.00069
2022920004	Hot Spring	Yellowstone National Park, WY	44.733519, -110.404033	29209878	49180	19	0.00039	22	0.00045
2022920005	Hot Spring	Yellowstone National Park, WY	44.733519, -110.7	17390485	27857	3	0.00011	4	0.00014
2022920006	Hot Spring	Yellowstone National Park, WY	44.286, -110.8785	11778110	19407	10	0.00052	7	0.00036
2022920007	Hot Spring	Yellowstone National Park, WY	44.733473, -110.70007	12043598	19672	5	0.00025	8	0.00041
2022920008	Hot Spring	Yellowstone National Park, WY	44.733519, -110.333	14407932	21034	7	0.00033	4	0.00019
2022920009	Hot Spring	Yellowstone National Park, WY	44.6533633, -110.4776669	7436946	10602	0	0	0	0
2022920010	Hot Spring	Yellowstone National Park, WY	44.7318889, -110.7110833	13542958	20567	5	0.00024	6	0.00029
2022920011	Hot Spring	Yellowstone National Park, WY	44.90485, -110.404033	12130906	17671	16	0.00091	15	0.00085
2022920012	Hot Spring	Yellowstone National Park, WY	44.5340836, -110.7978895	18442734	28729	12	0.00042	12	0.00042
2022920013	Hot Spring	Yellowstone National Park, WY	44.710087, -110.7413395	27959912	41922	21	0.0005	19	0.00045
2022920014	Hot Spring	Yellowstone National Park, WY	44.7523206, -110.7253926	3856788	6967	3	0.00043	4	0.00057
2022920015	Hot Spring	Yellowstone National Park, WY	44.9694208, -110.7098244	3242896	5243	9	0.00172	7	0.00134
2022920016	Hot Spring	Yellowstone National Park, WY	44.538694, -110.797972	32326855	58724	38	0.00065	32	0.00054
2022920017	Hot Spring	Yellowstone National Park, WY	44.7230812, -110.7040247	13622363	20366	0	0	0	0
2022920018	Hot Spring	Yellowstone National Park, WY	44.533365, -110.849887	31835426	56207	31	0.00055	31	0.00055
2022920019	Hot Spring	Yellowstone National Park, WY	44.7649458, -110.4303679	29273225	53782	34	0.00063	35	0.00065
2022920020	Hot Spring	Yellowstone National Park, WY	44.96507, -110.71215	34156953	60725	41	0.00068	31	0.00051
2022920021	Hot Spring	Yellowstone National Park, WY	44.733519, -110.404033	18742162	31932	23	0.00072	22	0.00069
2053563014	Hot Spring	Great Boiling Spring, Nevada	40.65833, -119.37772	48184699	93338	26	0.00028	22	0.00024
2061766003	Marine Hydrothermal	Gulf of California	27.506, -111.347	136121595	322198	21	7e-05	18	6e-05
2077657014	Marine Sediment	Santa Barbara Basin	34.21, -119.5	92521799	194477	119	0.00061	107	0.00055
2077657018	Marine Sediment	Santa Barbara Basin	34.21, -119.5	202177532	556613	104	0.00019	94	0.00017
2077657019	Marine Sediment	Santa Barbara Basin	34.21, -119.5	58173635	122543	59	0.00048	49	0.0004
2077657020	Seawater	Arthur Harbor, Palmer Station, Antarctic Peninsula	-64.766667, -64.05	3492552	4343	0	0	0	0
2077657023	Hot Spring	One Hundred Springs Plain, Yellowstone National Park	44.7315, -110.711389	35803982	81130	10	0.00012	9	0.00011
2077657024	Hot Spring	One Hundred Springs Plain, Yellowstone National Park	44.7315, -110.711389	27950878	65506	15	0.00023	16	0.00024
2081372001	Seawater	Deepwater Horizon Oil Spill, Gulf of Mexico	28.672222, -88.4375	23846686	54273	0	0	19	0.00035
2084038020	Hot Spring	Great Boiling Spring, Nevada	40.6614, -119.36622	7181123	14352	10	0.0007	10	0.0007
2084038021	Marine Sediment	Santa Barbara Basin	34.21, -119.5	90913355	239177	54	0.00023	38	0.00016
2088090012	Marine Sediment	Arctic Ocean	74.0678, -145.54687	191647483	350243	133	0.00038	126	0.00036
2088090017	Seawater	Deepwater Horizon Oil Spill, Gulf of Mexico	28.672222, -88.4375	25346668	41802	25	0.0006	22	0.00053
2100351001	Marine Sediment	Arctic Ocean	74.0678, -145.54687	312796620	789043	117	0.00015	117	0.00015
2100351008	Hot Spring	Norris Geyser Basin, Yellowstone National Park	44.733, -110.708917	66680933	140835	5	4e-05	12	9e-05
2100351010	Terrestrial Subsurface	Kitchener, Ontario	43.449776, -80.489086	64373035	119855	81	0.00068	76	0.00063
2100351011	Marine Sediment	Arctic Ocean	74.0678, -145.54687	386166283	1071024	130	0.00012	96	9e-05
2100351012	Marine Sediment	Arctic Ocean	74.0678, -145.54687	339945372	823046	140	0.00017	128	0.00016
2119805000	Seawater	Baltic Sea	59.888937, 24.847412	1811214	2226	4	0.0018	3	0.00135
2119805007	Hot Spring	Beowulf Spring in Norris Geyser Basin of Yellowstone National Park	44.733, -110.709	60745063	128754	19	0.00015	22	0.00017
2140918001	Hot Spring	One Hundred Springs Plain, Yellowstone National Park	44.7315, -110.711389	51518426	116192	13	0.00011	12	0.0001
2140918003	Marine Sediment	Santa Barbara Basin	34.21, -119.5	30097641	70150	53	0.00076	42	0.0006
2140918005	Marine Sediment	Arctic Ocean	74.0678, -145.54687	310086717	674403	150	0.00022	113	0.00017
2149837013	Seawater	Etoliko Lagoon, Greece	38.482158, 21.313175	576142926	1167723	86	7e-05	56	5e-05
2199352009	Marine Sediment	White Oak River Estuary, North Carolina, subseafloor sediments from , Sample 14E; 24 centimeters below seafloor	34.690251, -77.106571	22398301	51820	41	0.00079	35	0.00068
2236347000	Marine Hydrothermal	Guaymas Basin, Gulf of California	27.823, -111.4	21125931	81452	31	0.00038	29	0.00036
3300000082	Hot Spring	Great Boiling Spring, Nevada	40.71458, -119.369659	79003005	136556	59	0.00043	57	0.00042
3300000083	Hot Spring	Great Boiling Spring, Nevada	40.71458, -119.369659	63331166	117970	45	0.00038	37	0.00031
3300000084	Hot Spring	Great Boiling Spring, Nevada	40.67, -119.37	56055567	92428	24	0.00026	29	0.00031
3300000085	Hot Spring	Great Boiling Spring, Nevada	40.71458, -119.369659	79424423	131945	49	0.00037	45	0.00034
3300000106	Hot Spring	Great Boiling Spring, Nevada	40.71458, -119.369659	83681831	159033	49	0.00031	46	0.00029
3300000109	Hot Spring	Great Boiling Spring, Nevada	40.67, -119.37	72039733	136858	19	0.00014	27	0.0002
3300000118	Marine Sediment	OR site, Ushuaia Bay, Tierra del Fuego, Argentina	-54.80407, -68.288208	65605680	188499	26	0.00014	31	0.00016
3300000119	Marine Sediment	S1 site, Potter Cove, King George Island, Antarctic Peninsula	-62.230512, -58.656117	482644959	1118384	0	0	21	2e-05
3300000120	Marine Sediment	Adventfjord, Svalbard Archipelago, Norway, station 2	78.243786, 15.656147	127122681	315841	0	0	18	6e-05
3300000121	Marine Sediment	MC site, Ushuaia Bay, Tierra del Fuego, Argentina	-54.810872, -68.295525	153670253	477253	22	5e-05	23	5e-05
3300000122	Marine Sediment	OR site, Ushuaia Bay, Tierra del Fuego, Argentina	-54.80407, -68.288208	90812053	280565	46	0.00016	39	0.00014
3300000123	Marine Sediment	S2 site, Potter Cove, King George Island, Antarctic Peninsula	-62.231932, -58.655087	87052102	101505	6	6e-05	6	6e-05
3300000124	Marine Sediment	KBA site, Vaertahamnen, Baltic Sea, Sweden	59.363333, 18.119167	421162879	1084178	42	4e-05	39	4e-05
3300000125	Marine Sediment	MC site, Ushuaia Bay, Tierra del Fuego, Argentina	-54.810872, -68.295525	49715675	140407	20	0.00014	19	0.00014
3300000126	Marine Sediment	KBB site, Vaertahamnen, Baltic Sea, Sweden	59.350163, 18.107847	192914623	543176	52	0.0001	43	8e-05
3300000127	Marine Sediment	Adventfjord, Svalbard Archipelago, Norway, Station 1	78.237209, 15.677776	324203527	792093	26	3e-05	26	3e-05
3300000128	Marine Sediment	Adventfjord, Svalbard Archipelago, Norway, station 1	78.237209, 15.677776	534177234	1286395	29	2e-05	28	2e-05
3300000129	Marine Sediment	S2 site, Potter Cove, King George Island, Antarctic Peninsula	-62.231932, -58.655087	282842295	662193	29	4e-05	28	4e-05
3300000130	Marine Sediment	Adventfjord, Svalbard Archipelago, Norway, station 2	78.243786, 15.656147	614482412	1475369	51	3e-05	33	2e-05
3300000131	Marine Sediment	MC site, Ushuaia Bay, Tierra del Fuego, Argentina	-54.810872, -68.295525	57529379	175656	19	0.00011	22	0.00013
3300000132	Marine Sediment	S2 site, Potter Cove, King George Island, Antarctic Peninsula	-62.231932, -58.655087	194499958	470314	32	7e-05	28	6e-05
3300000133	Marine Sediment	Adventfjord, Svalbard Archipelago, Norway, station 1	78.237209, 15.677776	105310906	284073	21	7e-05	23	8e-05
3300000134	Marine Sediment	KBA site, Vaertahamnen, Baltic Sea, Sweden	59.363333, 18.119167	98592268	271033	33	0.00012	35	0.00013
3300000135	Marine Sediment	S1 site, Potter Cove, King George Island, Antarctic Peninsula	-62.230512, -58.656117	107809070	280781	26	9e-05	18	6e-05
3300000136	Marine Sediment	S1 site, Potter Cove, King George Island, Antarctic Peninsula	-62.230512, -58.656117	425245463	978889	32	3e-05	28	3e-05
3300000137	Seawater	Line P, North Pacific Ocean	48.35, -123.3	145843534	307376	11	4e-05	9	3e-05
3300000140	Seawater	P26, Pacific Ocean	50, -145	82331910	176245	6	3e-05	7	4e-05
3300000141	Seawater	P4, Pacific Ocean	48.65, -126.666667	115006357	256292	8	3e-05	12	5e-05
3300000142	Seawater	P16, Pacific Ocean	49.283333, -134.666667	148483697	332495	14	4e-05	18	5e-05
3300000144	Seawater	P4, Pacific Ocean	48.65, -126.666667	17957835	45291	13	0.00029	13	0.00029
3300000149	Seawater	P16, Pacific Ocean	49.283333, -134.666667	100875429	238270	10	4e-05	6	3e-05
3300000152	Seawater	P12, Pacific Ocean	48.97, -130.666667	132703477	308853	13	4e-05	16	5e-05
3300000157	Seawater	P26, Pacific Ocean	50, -145	112500286	266228	14	5e-05	13	5e-05
3300000159	Seawater	P26, Pacific Ocean	50, -145	81858014	186418	5	3e-05	6	3e-05
3300000161	Seawater	P12, Pacific Ocean	48.97, -130.666667	148199099	313773	9	3e-05	14	4e-05
3300000163	Seawater	P16, Pacific Ocean	49.283333, -134.666667	131118773	289920	22	8e-05	24	8e-05
3300000168	Seawater	P12, Pacific Ocean	48.97, -130.666667	50896847	127111	7	6e-05	7	6e-05
3300000173	Seawater	P16, Pacific Ocean	49.283333, -134.666667	55538670	137661	8	6e-05	7	5e-05
3300000178	Terrestrial Subsurface	Oak Ridge, Tennessee, USA	36.11569, -84.248657	226623009	629705	72	0.00011	72	0.00011
3300000179	Seawater	P16, Pacific Ocean	49.283333, -134.666667	126211292	282180	14	5e-05	11	4e-05
3300000180	Seawater	P26, Pacific Ocean	50, -145	17151026	47722	13	0.00027	14	0.00029
3300000181	Seawater	P4, Pacific Ocean	48.65, -126.666667	110583281	262570	16	6e-05	16	6e-05
3300000183	Seawater	P20, Pacific Ocean	49.566667, -138.666667	47736055	127075	12	9e-05	8	6e-05
3300000184	Terrestrial Subsurface	Oak Ridge, Tennessee, USA	36.12, -84.25	59149803	119806	14	0.00012	13	0.00011
3300000186	Seawater	P16, Pacific Ocean	49.283333, -134.666667	31667212	80181	12	0.00015	10	0.00012
3300000190	Seawater	P16, Pacific Ocean	49.283333, -134.666667	141642190	317863	17	5e-05	14	4e-05
3300000196	Seawater	P16, Pacific Ocean	49.283333, -134.666667	48511828	117853	11	9e-05	8	7e-05
3300000198	Seawater	Line P, North Pacific Ocean	48.35, -123.3	156793823	306148	19	6e-05	21	7e-05
3300000209	Seawater	P20, Pacific Ocean	49.566667, -138.666667	64433866	147783	7	5e-05	11	7e-05
3300000213	Seawater	Line P, North Pacific Ocean	48.35, -123.3	139108472	268237	17	6e-05	17	6e-05
3300000218	Seawater	P20, Pacific Ocean	49.566667, -138.666667	42025244	102315	13	0.00013	9	9e-05
3300000219	Seawater	P16, Pacific Ocean	49.283333, -134.666667	168607881	384376	19	5e-05	15	4e-05
3300000221	Seawater	P12, Pacific Ocean	48.97, -130.666667	40682411	113358	12	0.00011	11	0.0001
3300000222	Seawater	P12, Pacific Ocean	48.97, -130.666667	174490890	430705	16	4e-05	18	4e-05
3300000223	Seawater	P4, Pacific Ocean	48.65, -126.666667	57249694	161833	7	4e-05	11	7e-05
3300000227	Terrestrial Subsurface	Acquasanta Terme, Italy	42.766667, 13.4	300437395	538069	59	0.00011	51	9e-05
3300000228	Terrestrial Subsurface	Pozzo dei Cristalli, Frasassi Caves, Italy	43.383333, 12.95	448373019	974097	25	3e-05	22	2e-05
3300000229	Terrestrial Subsurface	Lago Infinito, wall in 7.1 m depth, Frasassi Caves, Italy	43.383333, 12.95	281841843	721213	54	7e-05	44	6e-05
3300000230	Terrestrial Subsurface	Grotta Sulfurea, Talus Pool, Frasassi Caves, Italy	43.383333, 12.95	581077747	1209977	29	2e-05	24	2e-05
3300000231	Terrestrial Subsurface	Lago Infinito, wall in 6.8 m depth, Frasassi Caves, Italy	43.383333, 12.95	654101350	1509822	69	5e-05	47	3e-05
3300000232	Terrestrial Subsurface	Pozzo dei Cristalli, Frasassi Caves, Italy	43.383333, 12.95	270071044	568490	48	8e-05	41	7e-05
3300000233	Terrestrial Subsurface	Fissure Spring, Frasassi Caves, Italy	43.383333, 12.95	242610534	471920	34	7e-05	25	5e-05
3300000234	Terrestrial Subsurface	Grotta Sulfurea, Talus Pool, Frasassi Caves, Italy	43.383333, 12.95	539638524	1025572	28	3e-05	19	2e-05
3300000235	Terrestrial Subsurface	Pozzo dei Cristalli, Frasassi Caves, Italy	43.383333, 12.95	252007248	513563	20	4e-05	24	5e-05
3300000236	Terrestrial Subsurface	Fissure Spring (below trough), Frasassi Caves, Italy	43.383333, 12.95	181303868	400347	30	7e-05	23	6e-05
3300000241	Marine Sediment	KBB site, Vaertahamnen, Baltic Sea, Sweden	59.350163, 18.107847	341240362	872663	42	5e-05	34	4e-05
3300000242	Marine Sediment	Ushuaia Bay, Tierra del Fuego, Argentina	-54.810872, -68.295525	273897218	717592	32	4e-05	37	5e-05
3300000243	Marine Sediment	Adventfjord, Svalbard Archipelago, Norway, station 2	78.243786, 15.656147	161365800	395468	21	5e-05	20	5e-05
3300000247	Seawater	P26, Pacific Ocean	50, -145	117250436	287460	14	5e-05	16	6e-05
3300000248	Seawater	P12, Pacific Ocean	48.97, -130.666667	91988334	236353	12	5e-05	14	6e-05
3300000249	Seawater	P12, Pacific Ocean	48.97, -130.666667	9631090	31919	16	0.0005	15	0.00047
3300000250	Seawater	P26, Pacific Ocean	50, -145	138253367	342771	14	4e-05	15	4e-05
3300000251	Seawater	P16, Pacific Ocean	49.283333, -134.666667	97916811	258103	14	5e-05	12	5e-05
3300000252	Seawater	P16, Pacific Ocean	49.283333, -134.666667	42773739	119520	11	9e-05	10	8e-05
3300000253	Seawater	P12, Pacific Ocean	48.97, -130.666667	17706213	53397	15	0.00028	14	0.00026
3300000255	Seawater	Line P, North Pacific Ocean	48.35, -123.3	167905077	368662	15	4e-05	15	4e-05
3300000256	Seawater	Line P, North Pacific Ocean	48.35, -123.3	193892245	429148	14	3e-05	16	4e-05
3300000257	Seawater	Line P, North Pacific Ocean	48.35, -123.3	194512667	519237	12	2e-05	9	2e-05
3300000258	Seawater	Line P, Station P20	49.566667, -138.666667	92615039	236870	14	6e-05	13	5e-05
3300000259	Seawater	P26, Pacific Ocean	50, -145	117987648	302454	12	4e-05	11	4e-05
3300000260	Seawater	Line P, Station P20, Pacific Ocean	49.566667, -138.666667	117112345	299546	9	3e-05	11	4e-05
3300000261	Seawater	Line P, Starion P20	49.566667, -138.666667	100937597	259913	14	5e-05	15	6e-05
3300000262	Seawater	Line P, Station P4	48.65, -126.666667	130918350	281305	10	4e-05	10	4e-05
3300000263	Seawater	Line P, Station P4	48.65, -126.666667	57375237	146291	4	3e-05	3	2e-05
3300000264	Seawater	Line P, Station P4	48.65, -126.666667	100368729	259887	11	4e-05	13	5e-05
3300000265	Seawater	Line P, Station P4	48.65, -126.666667	161683159	387725	8	2e-05	7	2e-05
3300000266	Seawater	Pacific Ocean	49.566667, -138.666667	68022008	164510	12	7e-05	13	8e-05
3300000322	Seawater	P12, Pacific Ocean	48.97, -130.666667	93120578	234472	18	8e-05	19	8e-05
3300000323	Seawater	P20, Pacific Ocean	49.566667, -138.666667	131828122	323509	22	7e-05	22	7e-05
3300000327	Seawater	Loihi Seamount, Hawaii	18.91, -155.26	8401934	9317	4	0.00043	7	0.00075
3300000340	Hot Spring	Echinus Geyser, Yellowstone National Park, Wyoming, USA	44.7220558, -110.7021057	54418506	100564	5	5e-05	5	5e-05
3300000341	Hot Spring	One Hundred Spring Plain, Yellowstone National Park, Wyoming, USA	44.7330426, -110.7089928	50121814	96596	5	5e-05	6	6e-05
3300000342	Hot Spring	One Hundred Spring Plain, Yellowstone National Park, Wyoming, USA	44.7330426, -110.7089928	53771850	97492	4	4e-05	6	6e-05
3300000343	Hot Spring	Mammoth Hot Spring (Liberty Cap Streamers), Yellowstone National Park, Wyoming, USA	44.972867, -110.704443	17809189	31947	19	0.00059	17	0.00053
3300000345	Hot Spring	Octopus Spring Streamers, Yellowstone National Park, Wyoming, USA	44.5340836, -110.7978895	49094763	110064	25	0.00023	23	0.00021
3300000346	Hot Spring	Beowulf Spring, Yellowstone National Park, Wyoming, USA	44.731451, -110.7113131	49953103	90260	5	6e-05	6	7e-05
3300000347	Hot Spring	Elkhorn Slough, Monterey Bay, California, USA	36.82188, -121.744	152203650	354269	17	5e-05	19	5e-05
3300000348	Hot Spring	Grendel Spring, Yellowstone National park. Wyoming, USA	44.7230812, -110.7095749	37662016	83612	6	7e-05	8	0.0001
3300000353	Hot Spring	Elkhorn Slough, Monterey Bay, California, USA	36.82188, -121.744	178522206	389398	22	6e-05	18	5e-05
3300000354	Hot Spring	Elkhorn Slough, Monterey Bay, California, USA	36.82188, -121.744	90602774	206164	19	9e-05	17	8e-05
3300000374	Marine Sediment	Eden Landing Ponds, San Francisco, CA, USA	37.569083, -122.103267	214760258	550194	38	7e-05	29	5e-05
3300000397	Hot Spring	Conch Spring, Yellowstone National Park, Wyoming, USA	44.5564135, -110.8321631	33484433	85714	12	0.00014	18	0.00021
3300000398	Hot Spring	Cistern Spring, Yellowstone National Park, USA	44.7230812, -110.7040247	47958071	99270	8	8e-05	8	8e-05
3300000403	Marine Sediment	Bioluminescent Bay, La Paraguera, Puerto Rico	17.967317, -67.018833	898328	2770	4	0.00144	2	0.00072
3300000409	Marine Sediment	Eden Landing Ponds, San Francisco, CA, USA	37.569167, -122.1019	24779847	77851	45	0.00058	44	0.00057
3300000422	Marine Sediment	Bioluminescent Bay, La Paraguera, Puerto Rico	17.966667, -67	71866427	188469	8	4e-05	7	4e-05
3300000426	Marine Sediment	Eden Landing Ponds, San Francisco, CA, USA	37.569083, -122.103267	90642744	224856	36	0.00016	36	0.00016
3300000444	Marine Sediment	Bioluminescent Bay, La Parguera, Puerto Rico	17.9675, -67.018833	10852089	26822	21	0.00078	16	0.0006
3300000463	Marine Sediment	Eden Landing Ponds, San Francisco, CA, USA	37.568817, -122.10315	38427200	111900	41	0.00037	46	0.00041
3300000501	Wastewater	Medicine Hat, Alberta Canada	50.03, -110.67	16836501	28729	14	0.00049	14	0.00049
3300000571	Terrestrial Subsurface	S. Glens Falls, New York, USA	43.29, -73.60	618992944	1391570	51	4e-05	35	3e-05
3300000574	Terrestrial Subsurface	S. Glens Falls, New York, USA	43.29, -73.60	568039809	1250031	42	3e-05	26	2e-05
3300000584	Wastewater	San Juan Basin, New Mexico, USA	37.00, -108.00	2155597	3734	2	0.00054	1	0.00027
3300000586	Wastewater	San Juan Basin, New Mexico, USA	37.00, -108.00	6638892	10839	8	0.00074	6	0.00055
3300000589	Wastewater	San Juan Basin, New Mexico, USA	37.00, -108.00	4731096	8390	71	0.00846	61	0.00727
3300000594	Wastewater	San Juan Basin, New Mexico, USA	37.00, -108.00	2121302	4128	101	0.02447	93	0.02253
3300000792	Marine Sediment	KBA site, Vaertahamnen, Baltic Sea, Sweden	59.363333, 18.119167	435329878	1121357	39	3e-05	35	3e-05
3300000815	Soil	Rifle, Colorado, USA	39.53, -107.78	100329698	108541	18	0.00017	11	0.0001
3300000910	Hot Spring	Hot Lake, Oroville, Washington, USA	48.973481, -119.476345	45710754	94932	22	0.00023	20	0.00021
3300000911	Hot Spring	Hot Lake, Oroville, Washington, USA	48.973481, -119.476345	48989163	97724	32	0.00033	20	0.0002
3300000946	Seawater	South Atlantic Ocean	-26.91, -21.43	22429581	50031	8	0.00016	12	0.00024
3300000950	Seawater	East of Rio de Janeiro, Brazil, South Atlantic Ocean	-22.97, -36.95	39450633	98715	12	0.00012	11	0.00011
3300000961	Seawater	North of Tokelau, South Pacific Ocean	-5.74, -170.77	53520525	137759	13	9e-05	9	7e-05
3300000965	Seawater	West of Perth, Australia, South Indian Ocean	-31.16, 110.18	10845980	28825	16	0.00056	14	0.00049
3300000966	Seawater	West of Cape Verde, Atlantic Ocean	14.52, -26	15807645	37087	15	0.0004	14	0.00038
3300000967	Seawater	West of Cape Verde, Atlantic Ocean	14.52, -26	10970046	22548	11	0.00049	11	0.00049
3300000971	Seawater	West of Cabo San Lucas, Mexico, North Pacific Ocean	15.91, -124.49	22232639	53359	18	0.00034	15	0.00028
3300000974	Seawater	South Indian Ocean	-29.81, 82.62	25480041	70014	18	0.00026	17	0.00024
3300000975	Seawater	East of Madagascar, South Indian Ocean	-27.98, 63.25	23559049	53642	18	0.00034	15	0.00028
3300000978	Seawater	South Indian Ocean	-29.65, 92.99	1166769	3574	4	0.00112	4	0.00112
3300000981	Seawater	South Indian Ocean	-30.33, 103.31	10584864	32039	24	0.00075	23	0.00072
3300000982	Seawater	South of Funchal, North Atlantic Ocean	32.08, -17.26	13515488	29332	8	0.00027	9	0.00031
3300000984	Seawater	East of Porto Seguro, South Atlantic Ocean	-15.83, -33.41	16939769	41671	11	0.00026	11	0.00026
3300000986	Hot Spring	Hot Lake, Oroville, Washington, USA	48.973481, -119.476345	35452264	59552	18	0.0003	18	0.0003
3300000994	Seawater	South Atlantic Ocean	-31.81, 6.84	4457938	13451	32	0.00238	25	0.00186
3300000995	Seawater	South Atlantic Ocean	-28.62, -11.8	17157742	40011	14	0.00035	12	0.0003
3300000999	Seawater	South of Fiji, South Pacific Ocean	-25.49, -179.52	10213671	27509	14	0.00051	14	0.00051
3300001004	Seawater	Balearic Sea, Spain	40.83194, 2.44806	334105	953	3	0.00315	3	0.00315
3300001006	Seawater	West of Cape Town, South Africa, South Atlantic Ocean	-32.81, 12.77	9110632	16795	11	0.00065	13	0.00077
3300001010	Seawater	South of Eden, South Pacific Ocean	-38.64, 150.41	6742179	20821	28	0.00134	27	0.0013
3300001013	Seawater	East of Recife, Brazil, South Atlantic Ocean	-9.12, -30.19	15390833	39504	16	0.00041	11	0.00028
3300001016	Seawater	South of Fiji, South Pacific Ocean	-28.41, 179.14	19691981	40800	19	0.00047	19	0.00047
3300001041	Soil	Rifle, Colorado, United States	39.53, -107.78	151598256	311998	30	0.0001	22	7e-05
3300001045	Seawater	Balearic Sea, Spain	40.83194, 2.44806	1389448	4729	12	0.00254	11	0.00233
3300001046	Seawater	South Indian Ocean	-30.33, 103.31	38186339	92175	12	0.00013	13	0.00014
3300001049	Seawater	Southwest of Acapulco, Mexico, North Pacific Ocean	12, -108.06	25131037	65203	15	0.00023	13	0.0002
3300001051	Seawater	Southwest of Acapulco, Mexico, North Pacific Ocean	12, -108.06	16312242	36795	13	0.00035	14	0.00038
3300001054	Seawater	North of Cape Verde, Atlantic Ocean	21.51, -23.45	22937310	57796	9	0.00016	10	0.00017
3300001058	Seawater	East of Durban, South Africa, South Indian Ocean	-33.55, 39.89	41948386	101664	10	0.0001	16	0.00016
3300001060	Seawater	North of Cape Verde, Atlantic Ocean	21.51, -23.45	44742882	104780	10	0.0001	11	0.0001
3300001063	Seawater	South Atlantic Ocean	-26.91, -21.43	31900329	79961	14	0.00018	14	0.00018
3300001068	Seawater	East of Porto Seguro, South Atlantic Ocean	-15.83, -33.41	51148844	122914	14	0.00011	11	9e-05
3300001091	Seawater	South of Cape Verde, Atlantic Ocean	7.33, -26	42896525	96736	10	0.0001	13	0.00013
3300001101	Hot Spring	Hot Lake, Oroville, Washington, USA	48.973481, -119.476345	37114875	63122	22	0.00035	17	0.00027
3300001105	Seawater	East of Hawaii, North Pacific Ocean	21.06, -150.35	48466561	108650	14	0.00013	12	0.00011
3300001106	Seawater	East of Recife, Brazil, South Atlantic Ocean	-9.12, -30.19	31899950	78438	9	0.00011	8	0.0001
3300001112	Hot Spring	Hot Lake, Oroville, Washington, USA	48.973481, -119.476345	61791375	115167	33	0.00029	21	0.00018
3300001113	Seawater	West of El Salvador, Pacific Ocean	10.09, -99.25	34500678	72987	12	0.00016	11	0.00015
3300001114	Seawater	North of Tokelau, South Pacific Ocean	-5.74, -170.77	26512352	64037	26	0.00041	24	0.00037
3300001115	Seawater	North Pacific Ocean	9.22, -163.53	34401031	81470	16	0.0002	13	0.00016
3300001117	Seawater	North Pacific Ocean	14.53, -118.77	71695887	158922	12	8e-05	13	8e-05
3300001118	Seawater	South Indian Ocean	-29.81, 82.62	11421185	33094	26	0.00079	21	0.00063
3300001121	Seawater	West of El Salvador, Pacific Ocean	10.09, -99.25	28979385	73505	12	0.00016	13	0.00018
3300001122	Seawater	South Atlantic Ocean	-3.03, -27.33	22278361	47526	6	0.00013	10	0.00021
3300001123	Seawater	South of Funchal, North Atlantic Ocean	32.08, -17.26	51412913	125725	12	0.0001	13	0.0001
3300001125	Seawater	South of Cape Verde, Atlantic Ocean	7.33, -26	43567243	107380	13	0.00012	13	0.00012
3300001126	Seawater	East of Rio de Janeiro, Brazil, South Atlantic Ocean	-22.97, -36.95	22609154	53713	7	0.00013	12	0.00022
3300001127	Seawater	Northeast of Antigua and Barbuda, North Atlantic Ocean	20, -52.63	53880225	125121	10	8e-05	9	7e-05
3300001129	Seawater	South Indian Ocean	-29.65, 92.99	16308748	49437	19	0.00038	17	0.00034
3300001229	Hot Spring	Elkhorn Slough, Monterey Bay, California, USA	36.83, -121.785	83534545	233277	28	0.00012	26	0.00011
3300001242	Soil	Rifle, Colorado, United States	39.53, -107.78	167635681	317553	18	6e-05	16	5e-05
3300001256	Hot Spring	Elkhorn Slough, Monterey Bay, California, USA	36.83, -121.785	1174355931	2917104	0	0	0	0
3300001286	Terrestrial Subsurface	S. Glens Falls, New York, USA	43.292222, -73.604444	15388853	39109	19	0.00049	18	0.00046
3300001288	Terrestrial Subsurface	S. Glens Falls, New York, USA	43.292222, -73.604444	17365134	36474	7	0.00019	8	0.00022
3300001289	Terrestrial Subsurface	S. Glens Falls, New York, USA	43.292222, -73.604444	19536072	31706	6	0.00019	4	0.00013
3300001290	Terrestrial Subsurface	S. Glens Falls, New York, USA	43.292222, -73.604444	21115293	34247	6	0.00018	6	0.00018
3300001291	Terrestrial Subsurface	S. Glens Falls, New York, USA	43.292222, -73.604444	17161512	35134	15	0.00043	14	0.0004
3300001292	Terrestrial Subsurface	S. Glens Falls, New York, USA	43.292222, -73.604444	21108176	34228	6	0.00018	6	0.00018
3300001294	Terrestrial Subsurface	S. Glens Falls, New York, USA	43.292222, -73.604444	8234700	19113	15	0.00078	16	0.00084
3300001295	Terrestrial Subsurface	S. Glens Falls, New York, USA	43.292222, -73.604444	121396	467	2	0.00428	1	0.00214
3300001296	Terrestrial Subsurface	S. Glens Falls, New York, USA	43.292222, -73.604444	4150569	13080	22	0.00168	20	0.00153
3300001297	Terrestrial Subsurface	S. Glens Falls, New York, USA	43.292222, -73.604444	721900	2579	7	0.00271	10	0.00388
3300001299	Terrestrial Subsurface	S. Glens Falls, New York, USA	43.292222, -73.604444	53328	160	0	0	0	0
3300001309	Hot Spring	1Geyser, Yellowstone National Park, Wyoming, USA	44.376, -110.69	76077788	182999	0	0	0	0
3300001337	Hot Spring	Conch Spring, Yellowstone National Park, Wyoming, USA	44.376, -110.69	62828840	161063	19	0.00012	23	0.00014
3300001338	Terrestrial Subsurface	S. Glens Falls, New York, USA	43.29, -73.60	14131294	19756	12	0.00061	9	0.00046
3300001339	Hot Spring	Octopus Spring, Yellowstone National Park, Wyoming, USA	44.376, -110.69	104542566	251552	20	8e-05	20	8e-05
3300001340	Hot Spring	Yellowstone National Park, Wyoming, USA	44.376, -110.69	264133541	479165	0	0	49	0.0001
3300001357	Hot Spring	Elkhorn Slough, Monterey Bay, California, USA	36.83, -121.785	829358478	1762530	0	0	31	2e-05
3300001380	Terrestrial Subsurface	S. Glens Falls, New York, USA	43.10, -73.60	629591094	1238958	86	7e-05	57	5e-05
3300001382	Hot Spring	Joseph's Coat, Yellowstone National Park, Wyoming, USA	44.376, -110.69	76452366	153246	13	8e-05	10	7e-05
3300001446	Hot Spring	Washburn Spring, Yellowstone National Park, Wyoming, USA	44.376, -110.69	287352834	498817	201	0.0004	167	0.00033
3300001568	Seawater	South of Port of Lincoln, Great Australian Bight, South Indian Ocean	-39.23, 135.19	27294377	68561	13	0.00019	10	0.00015
3300001569	Seawater	East of Madagascar, South Indian Ocean	-27.98, 63.25	80805655	164107	9	5e-05	8	5e-05
3300001570	Seawater	East of Hawaii, North Pacific Ocean	18.04, -133.26	28067177	74334	21	0.00028	19	0.00026
3300001571	Seawater	South of Fiji, South Pacific Ocean	-25.49, -179.52	17352071	40504	16	0.0004	9	0.00022
3300001572	Seawater	East of Durban, South Africa, South Indian Ocean	-33.55, 39.89	36031019	68251	12	0.00018	8	0.00012
3300001573	Seawater	South of Fiji, South Pacific Ocean	-28.41, 179.14	26213344	66348	14	0.00021	15	0.00023
3300001574	Seawater	South Atlantic Ocean	-3.03, -27.33	19054207	48567	14	0.00029	14	0.00029
3300001575	Seawater	West of Santa Cruz de la Palma, Atlantic Ocean	29.97, -23.69	60091275	137155	10	7e-05	11	8e-05
3300001576	Seawater	West of Cabo San Lucas, Mexico, North Pacific Ocean	14.53, -118.77	20711755	58232	17	0.00029	15	0.00026
3300001577	Seawater	East of Antigua and Barbuda, Atlantic Ocean	17.43, -59.83	39980741	85711	20	0.00023	12	0.00014
3300001578	Seawater	South Atlantic Ocean	-28.62, -11.8	12496182	29940	10	0.00033	11	0.00037
3300001579	Seawater	South Atlantic Ocean	-31.81, 6.84	36663823	92265	15	0.00016	12	0.00013
3300001581	Seawater	West of Cape Town, South Africa, South Atlantic Ocean	-32.81, 12.77	45491639	104341	19	0.00018	19	0.00018
3300001582	Seawater	North Pacific Ocean	9.22, -163.53	50860644	127157	18	0.00014	12	9e-05
3300001584	Seawater	North Pacific Ocean	14.53, -118.77	31712517	80685	9	0.00011	9	0.00011
3300001585	Seawater	West of Santa Cruz de la Palma, Atlantic Ocean	29.97, -23.69	43403400	108822	15	0.00014	12	0.00011
3300001586	Seawater	North of Tokelau, South Pacific Ocean	-5.74, -170.77	53520525	137764	13	9e-05	9	7e-05
3300001587	Seawater	Northeast of Antigua and Barbuda, North Atlantic Ocean	20, -52.63	70795660	167932	11	7e-05	12	7e-05
3300001676	Marine Hydrothermal	Tui Malila, Lau Basin, Pacific Ocean	-21.99002, -176.568744	107945955	143298	9	6e-05	10	7e-05
3300001678	Marine Hydrothermal	Mariner, Lau Basin, Pacific Ocean	-20.180059, -176.601242	160783924	205440	8	4e-05	12	6e-05
3300001679	Marine Hydrothermal	Tahi Moana, Lau Basin, Pacific Ocean	-20.682131, -176.183363	213649834	270314	9	3e-05	9	3e-05
3300001680	Marine Hydrothermal	Kilo Moana, Lau Basin, Pacific Ocean	-20.054108, -176.133522	317764985	406469	14	3e-05	11	3e-05
3300001681	Marine Hydrothermal	Abe, ELSC, Pacific Ocean	-20.111307, -176.989014	429147887	672341	11	2e-05	10	1e-05
3300001683	Marine Hydrothermal	Guyams Basin, Gulf of California, Pacific Ocean	27.015833, -111.425	572189614	955942	16	2e-05	12	1e-05
3300001684	Hot Spring	Joseph's Coat, Yellowstone National Park, Washington, USA	44.376, -110.69	131966625	297298	17	6e-05	16	5e-05
3300001706	Seawater	White Oak River estuary, North Carolina, USA	34.640199, -77.109447	101540249	271677	35	0.00013	37	0.00014
3300001751	Seawater	White Oak River estuary, North Carolina, USA	34.640199, -77.109447	558305947	1410986	58	4e-05	57	4e-05
3300001752	Seawater	White Oak River estuary, North Carolina, USA	34.640199, -77.109447	546713840	1387307	53	4e-05	53	4e-05
3300001753	Seawater	White Oak River estuary, North Carolina, USA	34.640199, -77.109447	719684507	1773993	64	4e-05	57	3e-05
3300001766	Terrestrial Subsurface	Coast Range Ophiolite, California	38.862, -122.430	17748808	24185	125	0.00517	83	0.00343
3300001767	Terrestrial Subsurface	Coast Range Ophiolite, California	38.862, -122.414	7694541	11152	62	0.00556	33	0.00296
3300001770	Terrestrial Subsurface	Coast Range Ophiolite, California	38.862, -122.414	11289781	18572	76	0.00409	56	0.00302
3300001774	Terrestrial Subsurface	Coast Range Ophiolite, California	38.862, -122.430	18218343	26131	110	0.00421	83	0.00318
3300001779	Terrestrial Subsurface	Coast Range Ophiolite, California	38.862, -122.430	19772287	32958	65	0.00197	56	0.0017
3300001786	Terrestrial Subsurface	Coast Range Ophiolite, California	38.862, -122.430	42785308	74725	112	0.0015	84	0.00112
3300001787	Terrestrial Subsurface	Coast Range Ophiolite, California	38.862, -122.430	39055228	73560	100	0.00136	75	0.00102
3300001790	Terrestrial Subsurface	Coast Range Ophiolite, California	38.862, -122.430	40981695	76643	65	0.00085	34	0.00044
3300001792	Terrestrial Subsurface	Coast Range Ophiolite, California	38.862, -122.430	46280736	83180	43	0.00052	37	0.00044
3300001793	Terrestrial Subsurface	Coast Range Ophiolite, California	38.862, -122.414	69308847	127969	118	0.00092	84	0.00066
3300001795	Terrestrial Subsurface	Coast Range Ophiolite, California	38.862, -122.430	77538149	150733	109	0.00072	78	0.00052
3300001796	Terrestrial Subsurface	Coast Range Ophiolite, California	38.862, -122.430	99192175	207238	44	0.00021	43	0.00021
3300001798	Terrestrial Subsurface	Coast Range Ophiolite, California	38.862, -122.430	108343839	231450	14	6e-05	16	7e-05
3300001799	Terrestrial Subsurface	Coast Range Ophiolite, California	38.882, -122.478	61436542	157995	58	0.00037	40	0.00025
3300001800	Terrestrial Subsurface	Coast Range Ophiolite, California	38.862, -122.414	125432850	253619	40	0.00016	28	0.00011
3300001805	Terrestrial Subsurface	Coast Range Ophiolite, California	38.862, -122.430	17346492	22798	112	0.00491	84	0.00368
3300001807	Terrestrial Subsurface	Espanola, New Mexico, United States	35.992, -106.0797	13042521	16192	4	0.00025	6	0.00037
3300001811	Terrestrial Subsurface	Coast Range Ophiolite, California	38.862, -122.430	39542105	73409	106	0.00144	79	0.00108
3300001812	Terrestrial Subsurface	Coast Range Ophiolite, California	38.862, -122.430	42804769	75621	98	0.0013	63	0.00083
3300001813	Terrestrial Subsurface	Coast Range Ophiolite, California	38.871, -122.428	105380265	169880	47	0.00028	40	0.00024
3300001814	Terrestrial Subsurface	Coast Range Ophiolite, California	38.862, -122.414	73246877	119215	113	0.00095	94	0.00079
3300001815	Hot Spring	Elkhorn Slough, Monterey Bay, California, USA	36.83, -121.785	1183569342	3431932	0	0	0	0
3300001854	Seawater	White Oak River estuary, North Carolina, USA	34.6478111, -77.1112083	930812755	2122334	0	0	53	2e-05
3300001855	Seawater	White Oak River estuary, North Carolina, USA	34.640199, -77.109447	303084940	795716	0	0	33	4e-05
3300001866	Terrestrial Subsurface	Espanola, New Mexico, United States	35.992, -106.0797	168772898	348007	67	0.00019	59	0.00017
3300001881	Terrestrial Subsurface	Espanola, New Mexico, United States	35.992, -106.0797	198477119	387362	99	0.00026	100	0.00026
3300001914	Terrestrial Subsurface	Espanola, New Mexico, United States	35.9918, -106.0796	253345860	461604	132	0.00029	125	0.00027
3300001922	Seawater	Polynesia	-9.571111, -131.49167	336890	629	0	0	0	0
3300001923	Seawater	South Pacific Ocean	-2.5819445, -97.85139	451181	795	4	0.00503	3	0.00377
3300001924	Seawater	Tikehau Lagoon, Polynesia Archipelagos	-15.277778, -148.22444	467458	887	0	0	1	0.00113
3300001925	Seawater	South Pacific Ocean	-5.93, -108.68694	494549	909	0	0	0	0
3300001926	Seawater	South Pacific Ocean	-7.1075, -116.11916	542583	953	3	0.00315	3	0.00315
3300001927	Seawater	Polynesia	-8.415, -124.23972	562395	1015	1	0.00099	1	0.00099
3300001928	Seawater	South Pacific Ocean	-7.661111, -116.11916	612652	1073	1	0.00093	2	0.00186
3300001929	Seawater	South Pacific Ocean	-4.498889, -105.07	610868	1093	4	0.00366	4	0.00366
3300001930	Seawater	South Pacific Ocean	-3.3433332, -101.373886	641644	1142	5	0.00438	7	0.00613
3300001931	Seawater	Polynesia	-9.0175, -127.76722	636185	1152	1	0.00087	1	0.00087
3300001932	Seawater	Moorea, Cooks Bay, Polynesia Archipelagos	-17.453056, -149.79889	638416	1194	5	0.00419	5	0.00419
3300001933	Seawater	Moorea, Outside Cooks Bay, Polynesia Archipelagos	-17.475834, -149.81223	666592	1245	0	0	0	0
3300001934	Seawater	Chesapeake Bay, Maryland, USA	38.133335, -76.38333	8669668	18293	0	0	0	0
3300001935	Seawater	Northern Gulf of Maine, Canada	43.63222, -66.84722	32214377	54370	6	0.00011	6	0.00011
3300001936	Seawater	Halifax, Nova Scotia, Canada	44.137222, -63.644444	33043040	56286	5	9e-05	6	0.00011
3300001937	Seawater	Equatorial Pacific Ocean	-1.9738889, -95.014725	36191958	63262	7	0.00011	5	8e-05
3300001938	Seawater	Bedford Basin, Nova Scotia, Canada	44.690277, -63.637222	37780382	64231	8	0.00012	7	0.00011
3300001939	Seawater	Block Island, New York, USA	41.09111, -71.60222	37747991	70271	7	0.0001	10	0.00014
3300001940	Seawater	Bay of Fundy, Nova Scotia, Canada	45.111668, -64.94666	40280931	72308	7	0.0001	5	7e-05
3300001941	Seawater	Browns Bank, Gulf of Maine, Canada	42.85278, -66.217224	43542027	80361	8	0.0001	9	0.00011
3300001942	Seawater	Polynesia	-10.131389, -135.44945	50627822	92716	14	0.00015	13	0.00014
3300001943	Seawater	Cape May, New Jersey, USA	38.94, -74.685	57052860	104685	8	8e-05	10	0.0001
3300001944	Seawater	Cabo Marshall, Isabella Island, Equador	-0.020833334, -91.19778	59116625	109167	7	6e-05	5	5e-05
3300001945	Seawater	Galapagos, Equador	1.2641667, -90.295	63080825	112133	7	6e-05	5	4e-05
3300001946	Seawater	North James Bay, Santigo Island, Equador	-0.2, -90.83528	66821013	121471	6	5e-05	6	5e-05
3300001947	Seawater	Gulf of Maine, Canada	42.503056, -67.24	74202974	125810	4	3e-05	4	3e-05
3300001948	Seawater	Chesapeake Bay, Maryland, USA	38.946945, -76.41722	75617290	128025	9	7e-05	8	6e-05
3300001949	Seawater	Panama City, Panama	6.492778, -82.90389	76322024	131400	8	6e-05	9	7e-05
3300001950	Seawater	Delaware Bay, New Jersey, USA	39.417778, -75.504166	79799345	138086	13	9e-05	14	0.0001
3300001951	Seawater	North Seamore Island, Equador	-0.38305557, -90.279724	78699872	138832	11	8e-05	6	4e-05
3300001952	Seawater	Newport Harbor, Rhode Island, USA	41.485832, -71.35111	85651166	142390	10	7e-05	6	4e-05
3300001953	Seawater	Key West, Florida, USA	24.488333, -83.07	84693422	146422	11	8e-05	10	7e-05
3300001954	Seawater	Colon, Panama	10.716389, -80.25445	86398015	149187	7	5e-05	6	4e-05
3300001955	Seawater	Gulf of Panama, Panama	8.129167, -79.69111	85347158	150154	11	7e-05	9	6e-05
3300001956	Seawater	Rangirora Atoll, Polynesia Archipelagos	-15.143611, -147.435	83225611	150651	7	5e-05	8	5e-05
3300001957	Seawater	Wolf Island, Equador	1.3891667, -91.81695	88794277	150749	7	5e-05	6	4e-05
3300001958	Seawater	Gulf of Mexico, USA	24.174723, -84.344444	88679928	152380	9	6e-05	9	6e-05
3300001959	Seawater	Isabella Island, Equador	-0.5938889, -91.06944	89398486	153552	0	0	15	0.0001
3300001960	Seawater	Charleston, South Carolina, USA	32.506943, -79.263885	90953628	159679	9	6e-05	11	7e-05
3300001961	Seawater	Dirty Rock, Cocos Island, Costa Rica	5.552778, -87.087776	88355364	163872	8	5e-05	4	2e-05
3300001962	Seawater	Cocos Island, Costa Rica	5.64, -86.56528	93108667	176476	8	5e-05	5	3e-05
3300001963	Seawater	Nags Head, North Carolina, USA	38.946945, -76.41722	98893834	189765	12	6e-05	10	5e-05
3300001964	Seawater	Rosario Bank, Honduras	18.036667, -83.78472	105952902	195732	4	2e-05	5	3e-05
3300001965	Seawater	Coastal Floreana, Equador	-1.2169445, -90.319725	135719211	247934	6	2e-05	4	2e-05
3300001966	Seawater	Roca Redonda, Equador	0.27222222, -91.63333	149020677	269933	7	3e-05	8	3e-05
3300001967	Seawater	Devil's Crown, Floreana Island, Equador	-1.2161111, -90.422775	155936908	288098	6	2e-05	5	2e-05
3300001968	Seawater	Lake Gatun, Panama	9.164444, -79.83611	166403274	296358	16	5e-05	13	4e-05
3300001969	Seawater	Yucatan Channel, Mexico	20.5225, -85.41361	174719720	322314	11	3e-05	8	2e-05
3300001970	Seawater	Punta Cormorant, Floreana Island, Equador	-1.2283334, -90.42917	210753851	328077	13	4e-05	10	3e-05
3300001971	Seawater	Sargasso Sea	32.174835, -64.01017	234314346	409070	15	4e-05	16	4e-05
3300001972	Seawater	Sargasso Sea	31.175, -64.32433	238012998	443409	9	2e-05	7	2e-05
3300001973	Seawater	Bermuda, Atlantic Ocean	32.166668, -64.5	244454478	459878	6	1e-05	6	1e-05
3300001974	Seawater	Upwelling, Fernandina Island, Equador	-0.3011111, -91.651665	269217765	475367	12	3e-05	12	3e-05
3300001986	Hot Spring	Yellowstone National Park, Wyoming, USA	44.6102, -110.4387	8676194	11634	44	0.00378	47	0.00404
3300002033	Seawater	Sargasso Sea	31.175, -64.32433	875598064	1295471	13	1e-05	10	1e-05
3300002040	Seawater	Sargasso Sea	32.174835, -64.01017	9006699085	16106649	0	0	0	0
3300002052	Seawater	White Oak River estuary, North Carolina, USA	34.640199, -77.109447	406438721	440211	0	0	38	9e-05
3300002085	Hot Spring	Yellowstone National Park, Wyoming, USA	44.6102, -110.4387	5693260	6797	39	0.00574	46	0.00677
3300002086	Hot Spring	Yellowstone National Park, Wyoming, USA	44.6102, -110.4387	9946993	11318	35	0.00309	34	0.003
3300002094	Soil	Rifle, Colorado, United States	39.53, -107.78	63701458	157562	25	0.00016	28	0.00018
3300002095	Soil	Rifle, Colorado, USA	39.534762, -107.782602	73108706	174109	26	0.00015	24	0.00014
3300002096	Soil	Rifle, Colorado, United States	39.53, -107.78	121439435	277091	26	9e-05	25	9e-05
3300002097	Soil	Rifle, Colorado, United States	39.53, -107.78	113674719	281053	29	0.0001	34	0.00012
3300002104	Soil	Rifle, Colorado, United States	39.53, -107.78	604335938	1469426	42	3e-05	26	2e-05
3300002105	Soil	Rifle, Colorado, United States	39.53, -107.78	912491392	2186121	0	0	0	0
3300002146	Soil	Rifle, Colorado, United States	39.53, -107.78	118930077	269038	23	9e-05	21	8e-05
3300002152	Soil	Rifle, Colorado, United States	39.53, -107.78	200118367	441302	41	9e-05	38	9e-05
3300002171	Terrestrial Subsurface	Espanola, New Mexico, United States	35.9918, -106.0796	213561661	469886	140	0.0003	132	0.00028
3300002172	Terrestrial Subsurface	Espanola, New Mexico, United States	35.992, -106.0797	244212906	505295	83	0.00016	59	0.00012
3300002176	Seawater	Pacific Ocean	0, 158	276313254	697677	11	2e-05	10	1e-05
3300002177	Seawater	Pacific Ocean	8, 156	188646492	432284	14	3e-05	17	4e-05
3300002178	Seawater	Pacific Ocean	8, 156	181297340	422891	13	3e-05	16	4e-05
3300002182	Hot Spring	Yellowstone National Park, Wyoming, USA	44.611006, -110.440182	849468172	1633191	131	8e-05	106	6e-05
3300002207	Hot Spring	Yellowstone National Park, Wyoming, USA	44.6102, -110.4387	2602104	2832	28	0.00989	35	0.01236
3300002208	Hot Spring	Yellowstone National Park, Wyoming, USA	44.6102, -110.4387	5684792	10447	43	0.00412	0	0
3300002221	Seawater	Pacific Ocean	8, 156	177946573	409086	18	4e-05	17	4e-05
3300002240	Terrestrial Subsurface	S. Glens Falls, New York, USA	43.099444, -73.604444	31505685	70516	32	0.00045	17	0.00024
3300002481	Marine Hydrothermal	Juan de Fuca Ridge flank, Pacific Ocean	47.76, -127.76	169908118	271595	1119	0.00412	1774	0.00653
3300002490	Terrestrial Subsurface	Mt. Terri, Switzerland	47.379, 7.1648	205087518	350317	184	0.00053	166	0.00047
3300002491	Hot Spring	Yellowstone National Park, Wyoming, USA	44.534, -110.7978	193210698	349616	50	0.00014	47	0.00013
3300002492	Hot Spring	Yellowstone National Park, Wyoming, USA	44.534, -110.7978	269970294	510790	62	0.00012	59	0.00012
3300002493	Hot Spring	Yellowstone National Park, Wyoming, USA	44.534, -110.7978	231777459	431981	64	0.00015	43	0.0001
3300002510	Hot Spring	Yellowstone National Park, Wyoming, USA	44.534, -110.7978	138130633	258379	52	0.0002	38	0.00015
3300002526	Seawater	Pacific Ocean	8, 156	137359742	296942	14	5e-05	16	5e-05
3300002528	Seawater	Pacific Ocean	8, 156	166925968	349989	11	3e-05	17	5e-05
3300002532	Marine Hydrothermal	Juan de Fuca Ridge flank, Pacific Ocean	47.76, -127.76	168044831	323415	34	0.00011	43	0.00013
3300002539	Hot Spring	Yellowstone National Park, Wyoming, USA	44.6102, -110.4387	14752731	21318	57	0.00267	57	0.00267
3300002540	Hot Spring	Yellowstone National Park, Wyoming, USA	44.6102, -110.4387	9640893	14159	51	0.0036	0	0
3300002544	Terrestrial Subsurface	Mt. Terri, Switzerland	47.379, 7.1648	118273023	204025	187	0.00092	178	0.00087
3300002545	Terrestrial Subsurface	Mt. Terri, Switzerland	47.379, 7.1648	217080939	357396	202	0.00057	194	0.00054
3300002546	Terrestrial Subsurface	Mt. Terri, Switzerland	47.379, 7.1648	135800316	237611	189	0.0008	177	0.00074
3300002555	Hot Spring	Yellowstone National Park, Wyoming, USA	44.6102, -110.4387	11216427	14800	52	0.00351	51	0.00345
3300002556	Hot Spring	Yellowstone National Park, Wyoming, USA	44.6102, -110.4387	10644896	15873	50	0.00315	0	0
3300002598	Seawater	British Columbia, Canada	48.6, -123.5	4002777	4142	4	0.00097	4	0.00097
3300002599	Seawater	British Columbia, Canada	48.6, -123.5	4911933	5611	4	0.00071	5	0.00089
3300002600	Seawater	British Columbia, Canada	48.6, -123.5	5626998	5992	3	0.0005	3	0.0005
3300002601	Seawater	British Columbia, Canada	48.6, -123.5	5386401	6267	1	0.00016	0	0
3300002602	Seawater	British Columbia, Canada	48.6, -123.5	5634790	6291	4	0.00064	3	0.00048
3300002603	Seawater	British Columbia, Canada	48.6, -123.5	5350867	6293	5	0.00079	4	0.00064
3300002604	Seawater	British Columbia, Canada	48.6, -123.5	5747254	6674	4	0.0006	4	0.0006
3300002605	Seawater	British Columbia, Canada	48.6, -123.5	5024035	6814	0	0	0	0
3300002606	Seawater	British Columbia, Canada	48.6, -123.5	6057435	6873	5	0.00073	4	0.00058
3300002607	Seawater	British Columbia, Canada	48.6, -123.5	5726421	6880	2	0.00029	2	0.00029
3300002608	Seawater	British Columbia, Canada	48.6, -123.5	4463947	5315	6	0.00113	6	0.00113
3300002735	Terrestrial Subsurface	Mt. Terri, Switzerland	47.379, 7.1648	101737461	210735	180	0.00085	182	0.00086
3300002756	Terrestrial Subsurface	Mt. Terri, Switzerland	47.379, 7.1648	251269858	471569	234	0.0005	206	0.00044
3300002913	Seawater	South Atlantic Ocean	-37.9831, -44.9892	406071638	905612	21	2e-05	19	2e-05
3300002919	Seawater	South Atlantic Ocean	-37.9728, -44.9905	230126467	480851	12	2e-05	20	4e-05
3300002955	Seawater	South Atlantic Ocean	-37.9951, -44.9972	112393422	286419	13	5e-05	12	4e-05
3300002956	Seawater	South Atlantic Ocean	-37.9983, -44.9998	149469971	366205	14	4e-05	19	5e-05
3300002965	Seawater	South Atlantic Ocean	-37.9728, -44.9905	204240100	437731	15	3e-05	21	5e-05
3300003073	Seawater	Beach at Golden Gardens Park, Seattle, WA, USA	47.6906558, -122.404411	2059964	1892	0	0	0	0
3300003076	Hot Spring	Mammoth Hot Springs, Yellowstone National Park, USA	44.969421, -110.709833	1722505	2060	6	0.00291	7	0.0034
3300003078	Hot Spring	Crater Hills, Alice Spring, Yellowstone National Park, USA	44.653363, -110.477667	1931913	2573	0	0	0	0
3300003090	Hot Spring	Calcite Springs, Scary Spring, Yellowstone National Park, USA	44.907703, -110.394845	3750619	5120	13	0.00254	13	0.00254
3300003091	Hot Spring	Norris Geyser Basin, Beowulf Spring, Yellowstone National Park, USA	44.7315, -110.711361	3611415	5361	1	0.00019	2	0.00037
3300003092	Hot Spring	Joseph's Coat Hot Spring and Scorodite Spring, Yellowstone National Park, USA	44.969421, -110.690383	3876971	5753	1	0.00017	1	0.00017
3300003098	Seawater	Gulf of Maine	43.14, -68.33	5278992	8597	0	0	0	0
3300003106	Terrestrial Subsurface	Oak Ridge Integrated Field Research Center, Tennessee, USA	36.159, -84.341	9502117	13643	6	0.00044	6	0.00044
3300003108	Terrestrial Subsurface	USA: Decatur, Illinois	39.850998, -88.939028	11543781	15026	4	0.00027	7	0.00047
3300003136	Marine Hydrothermal	Lost City Hydrothermal Field, Atlantic Ocean	30.12, -42.12	24827591	45285	101	0.00223	89	0.00197
3300003141	Marine Sediment	Shimokita Peninsula, Japan, in Northwestern Pacific	41.1773, 142.2013	34967503	70573	28	0.0004	26	0.00037
3300003142	Marine Sediment	Northwestern Pacific Ocean	41.1773, 142.2013	37446132	71971	23	0.00032	21	0.00029
3300003143	Marine Sediment	Northwestern Pacific Ocean	41.1773, 142.2013	36847613	74905	23	0.00031	22	0.00029
3300003144	Marine Sediment	Northwestern Pacific Ocean	41.1773, 142.2013	39626905	78193	36	0.00046	29	0.00037
3300003145	Marine Sediment	Northwestern Pacific Ocean	41.1773, 142.2013	48697521	90731	37	0.00041	29	0.00032
3300003147	Seawater	North Pacific Subtropical Gyre, Hawaii	22.887959, -158.027466	77402504	118165	21	0.00018	22	0.00019
3300003153	Marine Hydrothermal	Guaymas Basin, Gulf of mexico	27.25, -111	132350460	337654	22	7e-05	19	6e-05
3300003176	Terrestrial Subsurface	Mt. Terri, Switzerland	47.379, 7.1648	49750184	51299	177	0.00345	176	0.00343
3300003185	Seawater	South Atlantic Ocean	-38.0018, -44.9985	267071145	677144	10	1e-05	9	1e-05
3300003307	Hot Spring	Elkhorn Slough, Monterey Bay, California, USA	36.7999, -121.7999	107170253	238647	25	0.0001	23	0.0001
3300003364	Terrestrial Subsurface	Mt. Terri, Switzerland	47.379, 7.1648	81327445	135168	207	0.00153	193	0.00143
3300003366	Terrestrial Subsurface	Mt. Terri, Switzerland	47.379, 7.1648	410552336	700223	239	0.00034	230	0.00033
3300003475	Seawater	Indian Ocean	-8.505, 80.37556	224938505	730224	41	6e-05	41	6e-05
3300003483	Hot Spring	Yellowstone National Park, Wyoming, USA	44.376, -110.69	8490258	10642	0	0	0	0
3300003516	Seawater	Antarctic Ocean	-60.00007, 141.23353	77909508	239389	27	0.00011	32	0.00013
3300003517	Seawater	Antarctic Ocean	-60.00007, 141.23353	86297686	253569	33	0.00013	34	0.00013
3300003545	Terrestrial Subsurface	Coast Range Ophiolite, California	38.862, -122.430	3199366	7679	15	0.00195	14	0.00182
3300003546	Terrestrial Subsurface	Coast Range Ophiolite, California	38.862, -122.430	4752013	9762	58	0.00594	48	0.00492
3300003547	Terrestrial Subsurface	Coast Range Ophiolite, California	38.862, -122.430	8188330	15378	118	0.00767	93	0.00605
3300003548	Terrestrial Subsurface	Coast Range Ophiolite, California	38.862, -122.430	6018344	17782	26	0.00146	22	0.00124
3300003552	Terrestrial Subsurface	Coast Range Ophiolite, California	38.862, -122.430	23717608	51288	46	0.0009	33	0.00064
3300003597	Hot Spring	Yellowstone National Park, Wyoming, USA	44.376, -110.69	8232657	10354	0	0	0	0
3300003598	Hot Spring	Yellowstone National Park, Wyoming, USA	44.376, -110.69	73220362	118677	0	0	20	0.00017
3300003603	Hot Spring	Yellowstone National Park, Wyoming, USA	44.376, -110.69	79761076	124430	0	0	25	0.0002
3300003604	Hot Spring	Yellowstone National Park, Wyoming, USA	44.376, -110.69	62639124	104828	0	0	19	0.00018
3300003605	Hot Spring	Yellowstone National Park, Wyoming, USA	44.376, -110.69	114595371	204406	35	0.00017	36	0.00018
3300003606	Hot Spring	Yellowstone National Park, Wyoming, USA	44.376, -110.69	111431015	205178	34	0.00017	31	0.00015
3300003607	Hot Spring	Monarch Geyser, Yellowstone National Park, Wyoming, USA	44.376, -110.69	77361521	155140	0	0	0	0
3300003614	Hot Spring	Monarch Geyser, Yellowstone National Park, Wyoming, USA	44.376, -110.69	837787823	1538752	1	0	1	0
3300003673	Hot Spring	Elkhorn Slough, Monterey Bay, California, USA	36.83, -121.785	5932038	14512	23	0.00158	19	0.00131
3300003676	Hot Spring	Elkhorn Slough, Monterey Bay, California, USA	36.812947, -121.784692	17950540	38289	18	0.00047	18	0.00047
