# Supplementary material for: Genomic comparisons of a bacterial lineage that inhabits both marine and terrestrial deep subsurface systems
Source: PeerJ. 2017 Apr 6;5:e3134. doi: 10.7717/peerj.3134 (PMC5385130; doi:10.7717/peerj.3134)
Supplement: Table S3 [file peerj-05-3134-s006.xlsx]

## Sheet: Sheet1
Supplementary Table 3. Metagenomes with accessible raw reads from IMG, MG-RAST, and NCBI databases used in Figure 7B.
Figure ID Number	Metagenome Name	Environment	Accession ID	Num. Sequences	Marine	Terrestrial	Ca. D. cowenii: Ca. D. audax	Ca. D. audax: Ca. D. cowenii
	IMG
2	1362A_J573	Marine Subsurface	3300002481	222139678	464900 (0.00209)	63512 (0.00029)	7.3	0.1
6	1362B_J571	Marine Subsurface	3300002532	162009476	70104 (0.00043)	50107 (0.00031)	1.4	0.7
8	BRH/5	Terrestrial Subsurface	3300002490	165817576	50709 (0.00031)	48002 (0.00029)	1.1	0.9
--	BRH/9	Terrestrial Subsurface	3300002546	136350822	23858 (0.00017)	31765 (0.00023)	0.8	1.3
--	BRH/17	Terrestrial Subsurface	3300002544	355084508	76769 (0.00022)	66414 (0.00019)	1.2	0.9
--	BRH/21	Terrestrial Subsurface	3300003364	238914184	49357 (0.00021)	42902 (0.00018)	1.2	0.9
--	BRH/23	Terrestrial Subsurface	3300003366	112198138	21647 (0.00019)	33075 (0.00029)	0.7	1.5
--	BRH/37	Terrestrial Subsurface	3300002545	158653824	33808 (0.00021)	36879 (0.00023)	0.9	1.1
19	CR12Dec_QV11A	Serpentinite Groundwater	3300001766	34986206	11791 (0.00034)	18077 (0.00052)	0.7	1.5
23	CR12Aug_CSW11AC	Serpentinite Groundwater	3300001767	27352282	6293 (0.00023)	13417 (0.00049)	0.5	2.1
--	CR11_CSW11_NovA	Serpentinite Groundwater	3300001770	31355830	5698 (0.00018)	8470 (0.00027)	0.7	1.5
22	CR12Aug_QV11A	Serpentinite Groundwater	3300001774	41285196	12749 (0.00031)	21595 (0.00052)	0.6	1.7
20	CR12Jun_QV11	Serpentinite Groundwater	3300001779	40471018	7502 (0.00019)	12107 (0.0003)	0.6	1.6
13	CR11_8A_Apr	Serpentinite Groundwater	3300001786	34536632	9036 (0.00026)	10562 (0.00031)	0.9	1.2
15	CR11Jul_8A2	Serpentinite Groundwater	3300001787	34700986	8579 (0.00025)	10265 (0.0003)	0.8	1.2
11	CR11Aug_CSWold	Serpentinite Groundwater	3300001793	36296586	11296 (0.00031)	12836 (0.00035)	0.9	1.1
18	CR12Aug_8Bad	Serpentinite Groundwater	3300001795	32783754	7461 (0.00023)	9978 (0.0003)	0.7	1.3
--	CR12Aug_8Ca	Serpentinite Groundwater	3300001798	38317870	8126 (0.00021)	3695 (0.0001)	2.2	0.5
--	CR12Aug_1A	Serpentinite Groundwater	3300001799	22889926	4666 (0.0002)	3693 (0.00016)	1.3	0.8
--	CR12Mar_CSW14AB	Serpentinite Groundwater	3300001800	60007520	9409 (0.00016)	9543 (0.00016)	1	1
21	CR12Mar_QV11C	Serpentinite Groundwater	3300001805	37466460	10031 (0.00027)	16300 (0.00044)	0.6	1.6
16	CR12Aug_8Aab	Serpentinite Groundwater	3300001812	29728236	8364 (0.00028)	10505 (0.00035)	0.8	1.3
17	CR12Aug_CSW13A	Serpentinite Groundwater	3300001814	45383682	13082 (0.00029)	16715 (0.00037)	0.8	1.3
	NCBI
14	MM51940FW200712	Terrestrial Subsurface	SRR1633225	17645547	10406 (0.00059)	12165 (0.00069)	0.9	1.2
26	NO14FW130912	Terrestrial Subsurface	SRR1633226	22495503	9070 (0.0004)	213569 (0.00949)	0	23.5
	MG-RAST
--	RedSoudMineMic20050331	Terrestrial Subsurface	4440281	334386	24 (0.00007)	56 (0.00017)	0.4	2.3
1	BlackSoudMineMic20050331	Terrestrial Subsurface	4440282	388627	151 (0.00039)	8 (0.00002)	18.9	0.1
29	DCO_TCO_TT107FW240811_jointpair	Terrestrial Subsurface	4529964	30621568	22132 (0.00072)	3646771 (0.11909)	0	164.8
24	DCO_TCO_MM5_1940FW200712_jointpair	Terrestrial Subsurface	4529965	17144432	1471 (0.00009)	9031 (0.00053)	0.2	6.1
--	FI88FW031012	Terrestrial Subsurface	4536074	49275463	8296 (0.00017)	10894 (0.00022)	0.8	1.3
28	BE326FW250111 BH2	Terrestrial Subsurface	4536100	45814982	26004 (0.00057)	4230398 (0.09234)	0	162.7
27	BE326FW270712 BH2	Terrestrial Subsurface	4536472	55916530	13830 (0.00025)	1155298 (0.02066)	0	83.5
--	DR5IPCFW280711	Terrestrial Subsurface	4536473	58435529	10220 (0.00017)	6543 (0.00011)	1.6	0.6
25	TT109FW060312 BH2	Terrestrial Subsurface	4536476	53199996	11646 (0.00022)	82806 (0.00156)	0.1	7.1
--	H10-mar09	Terrestrial Subsurface	4536380	9365576	1458 (0.00016)	1929 (0.00021)	0.8	1.3
--	H10.3-jul09	Terrestrial Subsurface	4536381	19584506	3525 (0.00018)	2964 (0.00015)	1.2	0.8
--	H4-jul09	Terrestrial Subsurface	4536382	36703669	5645 (0.00015)	6488 (0.00018)	0.9	1.1
--	H4-mar09	Terrestrial Subsurface	4536383	22778839	3925 (0.00017)	2850 (0.00013)	1.4	0.7
--	HulkVentVirome	Marine Hydrothermal Vent	4448187	231246	17 (0.00007)	15 (0.00006)	1.1	0.9
--	HulkCellularMetagenome	Marine Hydrothermal Vent	4481541	808051	71 (0.00009)	93 (0.00012)	0.8	1.3
--	1229_1_mbsf_ORIGINAL	Marine Sediment	4440960	107977	7 (0.00006)	7 (0.00006)	1	1
--	308_1	Marine Sediment	4441214	270730	18 (0.00007)	12 (0.00004)	1.5	0.7
--	308_2	Marine Sediment	4441215	275397	17 (0.00006)	9 (0.00003)	1.9	0.5
12	Site5_Multicore_Unamplified	Marine Sediment	4496636	192658	58 (0.0003)	66 (0.00034)	0.9	1.1
--	EQP6	Marine Sediment	4508491	306445	4 (0.00001)	2 (0.00001)	2	0.5
--	Site1379_C1H2	Marine Sediment	4516248	300922	2 (0.00001)	2 (0.00001)	1	1
7	Lost City Hydrothermal Field carbonate chimney	Serpentinite Groundwater	4461585	46360	15 (0.00032)	14 (0.0003)	1.1	0.9
4	DCO_BRZ_BR2_L002_paired_003	Serpentinite Groundwater	4537095	397709	216 (0.00054)	128 (0.00032)	1.7	0.6
9	DCO_BRZ_BR2_L002_paired_001	Serpentinite Groundwater	4537096	4069441	1520 (0.00037)	1451 (0.00036)	1	1
3	DCO_BRZ_BR2_L002_paired_002	Serpentinite Groundwater	4537097	4090356	2413 (0.00059)	1439 (0.00035)	1.7	0.6
10	DCO_BRZ_BR2_L007_paired_001	Serpentinite Groundwater	4537098	4095347	1434 (0.00035)	1441 (0.00035)	1	1
5	DCO_BRZ_BR2_L007_paired_002	Serpentinite Groundwater	4537099	3144074	1726 (0.00055)	1071 (0.00034)	1.6	0.6
