# Supplementary material for: Genomic comparisons of a bacterial lineage that inhabits both marine and terrestrial deep subsurface systems
Source: PeerJ. 2017 Apr 6;5:e3134. doi: 10.7717/peerj.3134 (PMC5385130; doi:10.7717/peerj.3134)
Supplement: Table S7 [file peerj-05-3134-s010.xlsx]

## Sheet: Sheet1
Supplementary Table 7. Genes in “Ca. D. audaxviator” without homologs in “Ca. D. cowenii” genome.
Gene Object ID	Locus Tag	Gene Name	Length
641592868	Daud_0015	Alpha-glucosidase	816
641592869	Daud_0016	hypothetical protein	224
641592870	Daud_0017	hypothetical protein	203
641592871	Daud_0018	UDP-N-acetylglucosamine 2-epimerase	382
641592875	Daud_0022	oxidoreductase domain protein	345
641592876	Daud_0023	hypothetical protein	511
641592877	Daud_0024	hypothetical protein	502
641592878	Daud_0025	oxidoreductase domain protein	333
641592879	Daud_0026	hypothetical protein	489
641592880	Daud_0027	transferase hexapeptide repeat	217
641592882	Daud_0029	hypothetical protein	557
641592904	Daud_0050	hypothetical protein	95
641592947	Daud_0094	hypothetical protein	83
641592957	Daud_0104	formate dehydrogenase, alpha subunit (F420) (EC 1.2.99.-)	724
641592958	Daud_0105	acetyl-CoA decarbonylase/synthase alpha subunit (EC 1.2.99.2)	766
641592959	Daud_0106	acetyl-CoA decarbonylase/synthase epsilon subunit	184
641592960	Daud_0107	Cobyrinic acid a,c-diamide synthase	251
641592992	Daud_0136	hypothetical protein	178
641592993	Daud_0137	4Fe-4S ferredoxin, iron-sulfur binding domain protein	251
641592997	Daud_0141	nitrogen regulatory protein P-II family	111
641592998	Daud_0142	ammonium transporter (TC 1.A.11)	464
641592999	Daud_0143	Mo-nitrogenase iron protein subunit NifH (EC 1.18.6.1)	280
641593000	Daud_0144	nitrogen regulatory protein P-II family	105
641593001	Daud_0145	nitrogen regulatory protein P-II family	120
641593002	Daud_0146	nitrogenase component I, alpha chain	482
641593003	Daud_0147	Nitrogenase	490
641593004	Daud_0148	Nitrogenase	459
641593005	Daud_0149	Radical SAM domain protein	285
641593009	Daud_0156	hypothetical protein	177
641593011	Daud_0159	transposase, IS4 family protein	443
641593013	Daud_0161	hypothetical protein	82
641593014	Daud_0162	fumarate lyase	484
641593016	Daud_0164	hypothetical protein	128
641593019	Daud_0167	DsrE family protein	108
641593025	Daud_0172	Haloacid dehalogenase domain protein hydrolase	243
641593026	Daud_0173	transposase, IS4 family protein	443
641593027	Daud_0174	hypothetical protein	271
641593050	Daud_0193	hypothetical protein	73
641593051	Daud_0194	beta-lactamase domain protein	528
642485914	Daud_0195	hypothetical protein	70
641593052	Daud_0196	phosphoenolpyruvate synthase (EC 2.7.9.2)	317
642485915	Daud_0197	hypothetical protein	159
641593053	Daud_0198	hypothetical protein	79
641593054	Daud_0199	type III restriction enzyme, res subunit	1021
641593055	Daud_0200	DNA methylase N-4/N-6 domain protein	896
641593056	Daud_0201	transposase IS66	523
641593057	Daud_0202	IS66 Orf2 family protein	118
641593058	Daud_0203	hypothetical protein	101
642485916	Daud_0204	hypothetical protein	81
641593060	Daud_0206	hypothetical protein	154
641593069	Daud_0215	transposase, IS4 family protein	443
641593072	Daud_0218	transposase, IS4 family protein	443
641593103	Daud_0249	LSU ribosomal protein L36P	37
641593111	Daud_0257	transposase, IS4 family protein	443
641593112	Daud_0258	hypothetical protein	358
641593113	Daud_0259	Superfamily II DNA/RNA helicases, SNF2 family	578
641593114	Daud_0260	1,4-dihydroxy-6-naphthoate synthase	282
641593115	Daud_0261	futalosine hydrolase (EC 3.2.2.26)	213
641593117	Daud_0263	S-layer domain protein	503
641593119	Daud_0265	cation transporter	466
641593120	Daud_0266	TrkA-N domain protein	445
641593121	Daud_0267	hypothetical protein	74
641593122	Daud_0268	protein of unknown function UPF0131	596
641593123	Daud_0269	hypothetical protein	72
641593164	Daud_0310	tungstate/molybdate binding protein	275
641593165	Daud_0311	transcriptional regulator, PadR family	138
641593166	Daud_0312	arsenite efflux ATP-binding protein ArsA (TC 3.A.4.1.1)	397
641593168	Daud_0314	Appr-1-p processing domain protein	175
642485917	Daud_0315	hypothetical protein	92
641593169	Daud_0316	hypothetical protein	42
641593170	Daud_0317	hypothetical protein	141
641593172	Daud_0319	PilT protein domain protein	142
641593173	Daud_0320	hypothetical protein	94
641593174	Daud_0321	Integrase, catalytic region	462
642485918	Daud_0322	hypothetical protein	119
641593176	Daud_0323	membrane-bound metal-dependent hydrolase	170
641593177	Daud_0324	hypothetical protein	65
641593178	Daud_0325	ADP-ribosylation/Crystallin J1	320
642485919	Daud_0326	hypothetical protein	105
641593198	Daud_0346	RNA polymerase, sigma-24 subunit, ECF subfamily	181
641593199	Daud_0347	hypothetical protein	655
641593200	Daud_0348	Inorganic diphosphatase	548
641593213	Daud_0361	hypothetical protein	953
641593214	Daud_0362	hypothetical protein	114
642485920	Daud_0365	hypothetical protein	66
641593217	Daud_0366	hypothetical protein	168
641593218	Daud_0367	hypothetical protein	184
641593219	Daud_0368	hypothetical protein	96
641593220	Daud_0369	4Fe-4S ferredoxin, iron-sulfur binding domain protein	248
641593221	Daud_0370	hypothetical protein	149
642485921	Daud_0371	hypothetical protein	297
642485922	Daud_0372	hypothetical protein	54
641593222	Daud_0373	L-lactate permease	504
642485923	Daud_0374	hypothetical protein	290
641593223	Daud_0375	PilT protein domain protein	137
641593224	Daud_0376	transcriptional regulator, AbrB family	88
641593226	Daud_0378	hypothetical protein	107
641593228	Daud_0380	hypothetical protein	540
641593229	Daud_0381	hypothetical protein	403
641593230	Daud_0382	hypothetical protein	1404
641593231	Daud_0383	hypothetical protein	447
641593232	Daud_0384	copper amine oxidase domain protein	206
641593233	Daud_0385	hypothetical protein	103
641593234	Daud_0386	binding-protein-dependent transport systems inner membrane component	312
641593235	Daud_0387	binding-protein-dependent transport systems inner membrane component	309
641593237	Daud_0389	oligopeptide/dipeptide ABC transporter, ATPase subunit	321
641593238	Daud_0390	LmbE family protein	249
641593240	Daud_0392	hypothetical protein	185
642485924	Daud_0393	hypothetical protein	976
641593241	Daud_0394	hypothetical protein	1581
641593242	Daud_0395	hypothetical protein	626
642485925	Daud_0396	hypothetical protein	1748
642485926	Daud_0397	hypothetical protein	162
641593243	Daud_0398	hypothetical protein	337
641593244	Daud_0399	transposase, IS4 family protein	443
642485927	Daud_0400	hypothetical protein	432
641593245	Daud_0401	McrBC 5-methylcytosine restriction system component-like protein	435
641593246	Daud_0402	transcriptional modulator of MazE/toxin, MazF	120
641593247	Daud_0403	DNA binding domain, excisionase family	118
642485928	Daud_0404	hypothetical protein	46
642485929	Daud_0405	hypothetical protein	442
641593249	Daud_0407	transcriptional regulator, AbrB family	81
641593252	Daud_0410	molybdenum ABC transporter, periplasmic molybdate-binding protein	296
641593253	Daud_0411	molybdate ABC transporter, inner membrane subunit	227
641593256	Daud_0414	CopG domain protein DNA-binding domain protein	89
641593257	Daud_0415	PilT protein domain protein	141
641593258	Daud_0416	isochorismatase hydrolase	183
641593260	Daud_0418	protein of unknown function DUF82	262
641593261	Daud_0419	hypothetical protein	47
641593262	Daud_0420	hypothetical protein	246
641593263	Daud_0421	hypothetical protein	316
641593264	Daud_0422	hypothetical protein	94
641593267	Daud_0425	hypothetical protein	128
642485931	Daud_0427	hypothetical protein	91
641593268	Daud_0428	transposase, IS4 family protein	443
641593269	Daud_0429	protein of unknown function DUF342	574
641593270	Daud_0430	hypothetical protein	98
641593272	Daud_0432	transposase, IS4 family protein	443
641593276	Daud_0436	copper amine oxidase domain protein	471
641593277	Daud_0437	hypothetical protein	84
641593279	Daud_0439	protein of unknown function DUF6, transmembrane	325
641593280	Daud_0440	protein of unknown function DUF81	256
641593290	Daud_0450	hypothetical protein	279
641593291	Daud_0451	protein of unknown function DUF362	261
641593298	Daud_0458	hypothetical protein	332
641593313	Daud_0473	nitrogen regulatory protein P-II	117
641593314	Daud_0474	protein of unknown function DUF1538	245
641593315	Daud_0475	protein of unknown function DUF1538	230
641593319	Daud_0479	hydroxyethylthiazole kinase	273
641593335	Daud_0494	hypothetical protein	115
641593336	Daud_0495	hypothetical protein	93
641593340	Daud_0499	phage integrase family protein	285
641593341	Daud_0500	protein of unknown function UPF0150	85
641593342	Daud_0501	hypothetical protein	113
641593343	Daud_0502	hypothetical protein	104
641593344	Daud_0503	helicase domain protein	1147
641593345	Daud_0504	hypothetical protein	70
641593346	Daud_0505	ATP-dependent endonuclease, OLD family protein	663
641593347	Daud_0506	protein of unknown function DUF1156	1003
641593348	Daud_0507	hypothetical protein	321
641593349	Daud_0508	ATPase (AAA+ superfamily)-like protein	924
641593350	Daud_0509	hypothetical protein	85
641593351	Daud_0510	hypothetical protein	103
641593352	Daud_0511	hypothetical protein	81
641593353	Daud_0512	hypothetical protein	91
641593354	Daud_0513	hypothetical protein	87
641593355	Daud_0514	hypothetical protein	120
641593356	Daud_0515	protein of unknown function UPF0150	75
642485932	Daud_0516	hypothetical protein	71
642485933	Daud_0517	hypothetical protein	31
642485934	Daud_0518	hypothetical protein	108
641593358	Daud_0520	protein of unknown function UPF0150	74
641593359	Daud_0521	aldo/keto reductase	294
641593360	Daud_0522	hypothetical protein	224
642485935	Daud_0523	hypothetical protein	59
641593361	Daud_0524	phosphodiesterase, MJ0936 family	182
641593362	Daud_0525	HAD-superfamily hydrolase, subfamily IA, variant 3	209
641593366	Daud_0529	hypothetical protein	100
642485936	Daud_0532	hypothetical protein	74
641593371	Daud_0535	23S rRNA m(5)U-1939 methyltransferase (EC 2.1.1.190)	465
641593372	Daud_0536	hypothetical protein	123
641593373	Daud_0537	TatD-related deoxyribonuclease	262
641593375	Daud_0539	hypothetical protein	148
641593378	Daud_0542	glutaredoxin	72
641593379	Daud_0543	Rubrerythrin	178
641593406	Daud_0570	hypothetical protein	295
641593410	Daud_0574	hypothetical protein	209
641593412	Daud_0576	hypothetical protein	132
642485938	Daud_0578	hypothetical protein	322
641593413	Daud_0579	hypothetical protein	79
642485941	Daud_0582	hypothetical protein	141
642485942	Daud_0583	hypothetical protein	151
641593414	Daud_0584	hypothetical protein	96
642485943	Daud_0586	hypothetical protein	61
641593416	Daud_0587	transposase, IS4 family protein	443
641593426	Daud_0597	protein of unknown function DUF1232	160
641593441	Daud_0612	chromate transporter, chromate ion transporter (CHR) family	409
641593442	Daud_0613	transcriptional regulator, PadR family	101
641593494	Daud_0665	poly-gamma-glutamate synthesis protein (capsule biosynthesis protein)	392
641593496	Daud_0667	Radical SAM domain protein	341
641593497	Daud_0668	amino acid/amide ABC transporter substrate-binding protein, HAAT family (TC 3.A.1.4.-)	392
641593498	Daud_0669	amino acid/amide ABC transporter membrane protein 1, HAAT family (TC 3.A.1.4.-)	294
641593499	Daud_0670	amino acid/amide ABC transporter membrane protein 2, HAAT family (TC 3.A.1.4.-)	335
641593511	Daud_0682	Exopolysaccharide synthesis, ExoD	210
642485944	Daud_0684	hypothetical protein	70
642485945	Daud_0685	hypothetical protein	82
641593513	Daud_0686	Protein of unknown function DUF1670	274
641593514	Daud_0687	hypothetical protein	259
641593515	Daud_0688	hypothetical protein	122
641593516	Daud_0689	putative circadian clock protein, KaiC	467
641593519	Daud_0692	anti-sigma-factor antagonist	252
641593520	Daud_0693	anti-sigma-factor antagonist	120
642485946	Daud_0694	hypothetical protein	150
641593522	Daud_0696	Stage II sporulation E family protein	208
641593524	Daud_0698	diguanylate cyclase/phosphodiesterase	574
642485947	Daud_0699	hypothetical protein	168
641593525	Daud_0700	hypothetical protein	119
641593526	Daud_0701	hypothetical protein	337
641593527	Daud_0702	hypothetical protein	101
641593528	Daud_0703	IS66 Orf2 family protein	118
641593529	Daud_0704	transposase IS66	523
641593530	Daud_0705	hypothetical protein	209
641593532	Daud_0707	hypothetical protein	284
641593533	Daud_0708	DNA methylase N-4/N-6 domain protein	545
641593534	Daud_0709	protein of unknown function DUF450	382
641593535	Daud_0710	putative prophage repressor	245
641593536	Daud_0711	NERD domain protein	185
641593538	Daud_0713	transposase, IS605 OrfB family	460
641593539	Daud_0714	transposase, IS605 OrfB family	381
641593541	Daud_0716	hypothetical protein	274
641593542	Daud_0717	hypothetical protein	146
641593543	Daud_0718	hypothetical protein	160
641593544	Daud_0719	hypothetical protein	120
641593545	Daud_0720	hypothetical protein	68
641593547	Daud_0722	hypothetical protein	182
641593548	Daud_0723	hypothetical protein	226
641593549	Daud_0724	hypothetical protein	116
641593550	Daud_0725	Tetratricopeptide TPR_2 repeat protein	87
641593551	Daud_0726	hypothetical protein	64
641593552	Daud_0727	hypothetical protein	425
641593553	Daud_0728	hypothetical protein	119
641593555	Daud_0730	hypothetical protein	273
641593556	Daud_0731	WD-40 repeat-containing protein	570
642485948	Daud_0732	hypothetical protein	55
642485949	Daud_0733	hypothetical protein	261
641593557	Daud_0734	hypothetical protein	415
641593558	Daud_0735	hypothetical protein	103
641593559	Daud_0736	hypothetical protein	80
642485950	Daud_0737	hypothetical protein	63
641593560	Daud_0738	hypothetical protein	180
642485951	Daud_0739	hypothetical protein	318
641593561	Daud_0740	hypothetical protein	186
642485952	Daud_0741	hypothetical protein	217
641593563	Daud_0743	integrase, catalytic region	172
641593564	Daud_0744	transposase IS3/IS911	75
641593565	Daud_0745	signal transduction histidine kinase regulating citrate/malate metabolism	460
641593567	Daud_0747	hypothetical protein	147
641593568	Daud_0748	hypothetical protein	184
641593569	Daud_0749	hypothetical protein	168
641593570	Daud_0750	plasmid stabilization system	110
641593571	Daud_0751	prevent-host-death family protein	96
641593572	Daud_0752	hypothetical protein	310
641593573	Daud_0753	hypothetical protein	86
641593574	Daud_0754	hypothetical protein	558
641593575	Daud_0755	hypothetical protein	167
641593578	Daud_0759	hypothetical protein	108
642485954	Daud_0761	hypothetical protein	146
641593580	Daud_0762	transposase, IS605 OrfB family	440
641593581	Daud_0763	transcriptional regulator, XRE family	91
641593582	Daud_0764	protein of unknown function DUF891	117
642485955	Daud_0765	hypothetical protein	124
641593583	Daud_0766	hypothetical protein	80
641593584	Daud_0767	hypothetical protein	69
641593585	Daud_0768	protein of unknown function UPF0150	83
641593586	Daud_0769	hypothetical protein	62
641593589	Daud_0772	hypothetical protein	44
641593590	Daud_0773	phosphoenolpyruvate carboxylase, type 2 (EC 4.1.1.31)	489
641593591	Daud_0774	ISPsy22, transposase truncated	77
641593593	Daud_0776	helix-turn-helix domain protein	123
641593594	Daud_0777	transcriptional regulator, XRE family	83
641593595	Daud_0778	hypothetical protein	1030
641593598	Daud_0781	hypothetical protein	110
642485956	Daud_0782	hypothetical protein	79
641593600	Daud_0784	transposase	440
642485957	Daud_0785	hypothetical protein	67
641593602	Daud_0787	sodium/sulphate symporter	491
641593606	Daud_0792	transposase, IS4 family protein	577
641593607	Daud_0793	hypothetical protein	168
641593610	Daud_0796	hypothetical protein	1227
641593611	Daud_0797	protein of unknown function DUF262	522
642485959	Daud_0798	hypothetical protein	221
641593612	Daud_0799	phosphoadenosine phosphosulfate reductase	755
641593613	Daud_0800	hypothetical protein	937
641593614	Daud_0801	hypothetical protein	431
641593615	Daud_0802	hypothetical protein	772
641593616	Daud_0803	ATP-dependent protease La	485
641593617	Daud_0804	hypothetical protein	317
642485960	Daud_0805	hypothetical protein	133
642485961	Daud_0806	hypothetical protein	111
641593618	Daud_0807	hypothetical protein	157
641593619	Daud_0808	beta-lactamase domain protein	519
641593620	Daud_0809	hypothetical protein	110
641593621	Daud_0810	hypothetical protein	112
642485962	Daud_0811	LSU ribosomal protein L24A	139
641593622	Daud_0812	hypothetical protein	199
641593623	Daud_0813	hypothetical protein	191
641593624	Daud_0814	hypothetical protein	296
641593625	Daud_0815	TRAG family protein	648
641593626	Daud_0816	DEAD/DEAH box helicase domain protein	685
641593631	Daud_0821	hypothetical protein	123
641593634	Daud_0824	domain of unknown function DUF1745	379
641593641	Daud_0831	protein of unknown function UPF0047	137
642485963	Daud_0834	hypothetical protein	65
641593654	Daud_0845	transposase, IS605 OrfB family	381
642485964	Daud_0850	hypothetical protein	63
641593662	Daud_0854	Muramoyltetrapeptide carboxypeptidase	312
641593663	Daud_0855	methyl-accepting chemotaxis sensory transducer	550
641593667	Daud_0858	protein of unknown function DUF1405	204
641593671	Daud_0862	mannose-6-phosphate isomerase, type 2 (EC 5.3.1.8)	355
641593672	Daud_0863	Mannose-1-phosphate guanylyltransferase (GDP), Phosphomannomutase	813
641593673	Daud_0864	glycosidase, PH1107-related	489
641593674	Daud_0865	glycosyl transferase, group 1	763
641593678	Daud_0867	hypothetical protein	126
641593695	Daud_0883	hypothetical protein	233
641593700	Daud_0888	transposase IS200-family protein	131
641593701	Daud_0889	transposase, IS605 OrfB	440
641593702	Daud_0890	hypothetical protein	62
641593710	Daud_0898	hypothetical protein	85
641593716	Daud_0904	protein of unknown function UPF0150	134
641593732	Daud_0920	putative regulatory protein, FmdB family	65
641593763	Daud_0950	Integrase, catalytic region	442
641593766	Daud_0953	type IV pilus assembly protein PilM	345
641593767	Daud_0954	Fimbrial assembly family protein	200
641593768	Daud_0955	hypothetical protein	192
641593772	Daud_0960	hypothetical protein	89
641593773	Daud_0961	hypothetical protein	550
641593774	Daud_0962	hypothetical protein	118
641593775	Daud_0963	hypothetical protein	132
641593776	Daud_0964	hypothetical protein	87
641593777	Daud_0965	hypothetical protein	415
641593778	Daud_0966	hypothetical protein	181
641593783	Daud_0971	general secretion pathway protein H	173
641593784	Daud_0972	hypothetical protein	147
641593788	Daud_0976	Fimbrial assembly family protein	221
641593789	Daud_0977	hypothetical protein	302
641593790	Daud_0978	copper amine oxidase domain protein	141
641593791	Daud_0979	metal dependent phosphohydrolase	374
641593792	Daud_0980	hypothetical protein	112
641593795	Daud_0983	PilT protein domain protein	133
641593796	Daud_0984	putative transcriptional regulator, CopG family	81
641593797	Daud_0985	molybdenum cofactor guanylyltransferase (EC 2.7.7.77)/molybdopterin guanine dinucleotide biosynthesis accessory protein MobB	374
641593805	Daud_0993	hypothetical protein	184
641593807	Daud_0995	hypothetical protein	123
641593808	Daud_0996	hypothetical protein	197
641593809	Daud_0997	hypothetical protein	399
641593861	Daud_1049	RNA methyltransferase, TrmH family, group 2	153
641593864	Daud_1052	hypothetical protein	67
641593871	Daud_1059	Superoxide dismutase	197
641593894	Daud_1079	hypothetical protein	101
641593896	Daud_1081	polysaccharide deacetylase	255
641593899	Daud_1084	5-carboxymethyl-2-hydroxymuconate delta-isomerase	254
641593937	Daud_1122	heat shock protein Hsp20	170
641593938	Daud_1123	hypothetical protein	343
641593953	Daud_1138	nitrite and sulphite reductase 4Fe-4S region	242
641593955	Daud_1140	hypothetical protein	42
641593956	Daud_1141	putative NADH-dependent flavin oxidoreductase	77
641593958	Daud_1143	RNA-3'-phosphate cyclase	364
641593966	Daud_1151	periplasmic solute binding protein	291
641594021	Daud_1206	ABC-2 type transporter	243
641594023	Daud_1208	protoporphyrin IX magnesium-chelatase (EC 6.6.1.1)	372
641594024	Daud_1209	protoporphyrin IX magnesium-chelatase (EC 6.6.1.1)	670
641594025	Daud_1210	cobaltochelatase CobN subunit (EC 6.6.1.2)	1210
641594026	Daud_1211	ABC-2 type transporter	252
641594027	Daud_1212	ABC-2 type transporter	259
641594030	Daud_1215	copper amine oxidase domain protein	784
641594032	Daud_1217	transport system permease protein	362
641594033	Daud_1218	periplasmic binding protein	358
641594034	Daud_1219	cobaltochelatase CobN subunit (EC 6.6.1.2)	1285
641594044	Daud_1228	hypothetical protein	98
641594059	Daud_1243	hypothetical protein	121
641594062	Daud_1246	transposase, IS4 family protein	443
641594064	Daud_1247	hypothetical protein	112
641594065	Daud_1248	hypothetical protein	151
641594075	Daud_1258	leucine rich repeat variant	404
641594076	Daud_1259	AAA ATPase	412
641594077	Daud_1260	hypothetical protein	415
641594083	Daud_1266	GTP-binding protein, HSR1-related	689
641594084	Daud_1267	FeoA family protein	83
641594103	Daud_1286	CRISPR-associated protein, Csa1 family	311
641594104	Daud_1287	CRISPR-associated exonuclease, Cas4 family	190
641594105	Daud_1288	CRISPR-associated protein, Cas2 family	106
641594106	Daud_1289	CRISPR-associated protein, Cas1 family	306
641594107	Daud_1290	CRISPR-associated helicase, Cas3 family	795
641594108	Daud_1291	CRISPR-associated protein, Cas5t family	255
641594109	Daud_1292	CRISPR-associated autoregulator, Cst2 family	355
641594110	Daud_1293	CRISPR-associated protein, Cst1 family	518
641594111	Daud_1294	regulatory protein, DeoR	336
641594112	Daud_1295	conserved hypothetical cytosolic protein	331
641594113	Daud_1296	hypothetical protein	255
641594115	Daud_1298	hypothetical protein	235
641594129	Daud_1312	adenosylcobinamide kinase (EC 2.7.1.156)/adenosylcobinamide-phosphate guanylyltransferase (EC 2.7.7.62)	200
641594130	Daud_1313	cobalamin-5'-phosphate synthase (EC 2.7.8.26)	252
641594131	Daud_1314	nicotinate-nucleotide-dimethylbenzimidazole phosphoribosyltransferase (EC 2.4.2.21)	353
641594133	Daud_1316	transport system permease protein	338
641594134	Daud_1317	periplasmic binding protein	307
642485967	Daud_1319	hypothetical protein	100
641594142	Daud_1326	8-amino-7-oxononanoate synthase (EC 2.3.1.47)	384
641594143	Daud_1327	dethiobiotin synthase (EC 6.3.3.3)	263
641594145	Daud_1329	hypothetical protein	223
641594146	Daud_1330	Methyltransferase type 11	248
641594147	Daud_1331	biotin synthase (EC 2.8.1.6)	328
642485968	Daud_1332	hypothetical protein	56
641594149	Daud_1334	hypothetical protein	168
641594150	Daud_1335	hypothetical protein	174
641594214	Daud_1394	hypothetical protein	73
641594216	Daud_1396	Peptidylprolyl isomerase	141
641594217	Daud_1397	ATP-dependent RNA helicase DbpA (EC 5.99.1.-)	533
642485969	Daud_1409	hypothetical protein	98
642485970	Daud_1417	hypothetical protein	82
641594241	Daud_1422	putative regulatory protein, FmdB family	70
641594266	Daud_1447	hypothetical protein	104
642485971	Daud_1448	hypothetical protein	437
641594301	Daud_1483	hypothetical protein	113
641594302	Daud_1484	hypothetical protein	147
641594307	Daud_1485	gas vesicle protein GVPa	116
641594308	Daud_1486	Gas vesicle synthesis GvpLGvpF	368
641594309	Daud_1487	Gas vesicle K	105
641594310	Daud_1488	hypothetical protein	340
641594311	Daud_1489	gas vesicle protein GVPa	126
641594312	Daud_1490	Gas vesicle G	81
641594315	Daud_1493	hypothetical protein	122
641594316	Daud_1494	hypothetical protein	184
641594317	Daud_1495	gas vesicle protein GvpN	304
641594318	Daud_1496	hypothetical protein	93
641594319	Daud_1497	hypothetical protein	105
641594320	Daud_1498	gas vesicle protein GVPa	75
641594321	Daud_1499	gas vesicle protein GVPa	76
641594322	Daud_1500	hypothetical protein	83
641594324	Daud_1501	Integrase, catalytic region	442
641594326	Daud_1502	transposase, IS4 family protein	443
641594327	Daud_1503	transposase, IS4 family protein	443
641594336	Daud_1512	protein of unknown function DUF55	158
642485972	Daud_1513	hypothetical protein	55
641594337	Daud_1514	copper amine oxidase domain protein	281
641594338	Daud_1515	hypothetical protein	983
642485973	Daud_1516	hypothetical protein	203
641594339	Daud_1517	hypothetical protein	108
641594340	Daud_1518	hypothetical protein	102
641594341	Daud_1519	hypothetical protein	116
642485974	Daud_1520	hypothetical protein	88
641594342	Daud_1521	hypothetical protein	110
641594347	Daud_1525	hypothetical protein	82
641594350	Daud_1528	hypothetical protein	125
641594360	Daud_1536	Dinitrogenase iron-molybdenum cofactor biosynthesis	130
641594361	Daud_1537	Cobyrinic acid a,c-diamide synthase	287
641594362	Daud_1538	hypothetical protein	124
641594363	Daud_1539	hypothetical protein	81
641594367	Daud_1543	peptidase S16, lon domain protein	865
641594376	Daud_1553	hypothetical protein	354
641594387	Daud_1564	major facilitator superfamily MFS_1	400
641594388	Daud_1565	hypothetical protein	386
641594389	Daud_1566	copper amine oxidase domain protein	251
641594390	Daud_1567	DNA-directed DNA polymerase	236
641594392	Daud_1569	hypothetical protein	54
641594394	Daud_1571	hypothetical protein	122
641594399	Daud_1576	Desulfoferrodoxin Dfx domain protein	39
641594400	Daud_1577	putative formate dehydrogenase formation protein	282
641594403	Daud_1580	Formate dehydrogenase	808
641594404	Daud_1581	Formate dehydrogenase	216
641594405	Daud_1582	transposase, IS605 OrfB	440
641594406	Daud_1583	transposase IS200-family protein	131
641594462	Daud_1639	ABC-type Co2+ transport system periplasmic component-like protein	314
641594463	Daud_1640	hypothetical protein	154
641594464	Daud_1641	UspA domain protein	294
642485976	Daud_1646	hypothetical protein	70
641594469	Daud_1647	hypothetical protein	134
641594481	Daud_1659	histidine triad (HIT) protein	125
641594484	Daud_1662	capsular polysaccharide biosynthesis protein	240
641594493	Daud_1671	protein of unknown function DUF559	90
641594494	Daud_1672	Superfamily I DNA and RNA helicases and helicase subunits-like protein	946
641594495	Daud_1673	DEAD/DEAH box helicase domain protein	1589
641594496	Daud_1674	hypothetical protein	1866
641594497	Daud_1675	UvrD/REP helicase family protein	212
642485977	Daud_1676	hypothetical protein	157
641594498	Daud_1677	hypothetical protein	71
641594502	Daud_1681	hypothetical protein	116
641594503	Daud_1682	protein of unknown function DUF433	76
641594506	Daud_1685	dTDP-glucose 4,6-dehydratase (EC 4.2.1.46)	342
641594507	Daud_1686	dTDP-4-dehydrorhamnose reductase (EC 1.1.1.133)	285
641594508	Daud_1687	glucose-1-phosphate thymidyltransferase	356
641594509	Daud_1688	dTDP-4-dehydrorhamnose 3,5-epimerase (EC 5.1.3.13)	190
641594510	Daud_1689	glycosyl transferase, group 1	382
641594511	Daud_1690	Methyltransferase type 11	235
642485978	Daud_1691	hypothetical protein	91
641594512	Daud_1692	glycosyl transferase, group 1	375
641594513	Daud_1693	hypothetical protein	472
641594514	Daud_1694	glycosyl transferase, family 2	340
641594515	Daud_1695	Methyltransferase type 11	211
641594516	Daud_1696	hypothetical protein	67
641594517	Daud_1697	glycosyl transferase, family 2	336
641594519	Daud_1699	WxcM domain protein, C-terminal domain protein	136
641594521	Daud_1701	sulfatase	483
641594522	Daud_1702	phosphoadenylylsulfate reductase (thioredoxin) (EC 1.8.4.8)	228
641594524	Daud_1704	hypothetical protein	104
641594527	Daud_1707	hypothetical protein	280
641594528	Daud_1708	transcriptional regulator, AbrB family	92
641594529	Daud_1709	PilT protein domain protein	147
641594530	Daud_1710	Resolvase, N-terminal domain	222
642485979	Daud_1711	hypothetical protein	421
641594531	Daud_1712	hypothetical protein	167
641594532	Daud_1713	hypothetical protein	82
641594537	Daud_1718	protein of unknown function DUF368	297
641594538	Daud_1719	PHP C-terminal domain protein	261
641594541	Daud_1722	Radical SAM domain protein	371
641594542	Daud_1723	response regulator receiver protein	290
641594543	Daud_1724	heat-inducible transcription repressor HrcA	232
641594544	Daud_1725	Radical SAM domain protein	460
641594545	Daud_1726	Patatin	311
642485980	Daud_1729	hypothetical protein	129
641594548	Daud_1730	transposase, IS605 OrfB	443
641594549	Daud_1731	transposase IS200-family protein	131
641594552	Daud_1735	transposase, IS4 family protein	443
641594569	Daud_1752	transposase, IS4 family protein	443
641594586	Daud_1769	protein of unknown function DUF86	292
641594590	Daud_1773	HAD-superfamily hydrolase, subfamily IA, variant 1	227
641594591	Daud_1774	protein of unknown function DUF201	312
641594592	Daud_1775	Methyltransferase type 12	298
641594593	Daud_1776	NAD-dependent epimerase/dehydratase	310
641594602	Daud_1785	hypothetical protein	161
641594614	Daud_1797	hypothetical protein	104
641594615	Daud_1798	putative CRISPR-associated RAMP protein	339
641594616	Daud_1799	hypothetical protein	214
641594617	Daud_1800	protein of unknown function DUF324	299
641594618	Daud_1801	CRISPR-associated protein, Csx7 family	282
641594619	Daud_1802	hypothetical protein	141
641594620	Daud_1803	CRISPR-associated RAMP protein, Csx10 family	423
641594621	Daud_1804	protein of unknown function DUF324	240
641594622	Daud_1805	hypothetical protein	759
641594623	Daud_1806	hypothetical protein	423
641594627	Daud_1810	CRISPR-associated protein, Cas2 family	87
641594630	Daud_1813	CRISPR-associated helicase, Cas3 family	729
641594631	Daud_1814	CRISPR-associated protein, Cas5 family	238
641594632	Daud_1815	CRISPR-associated autoregulator, Cst2 family	324
641594633	Daud_1816	hypothetical protein	514
641594641	Daud_1824	putative transcriptional regulator	304
642485982	Daud_1826	hypothetical protein	57
642485983	Daud_1828	hypothetical protein	76
641594644	Daud_1829	DNA binding domain, excisionase family	109
642485984	Daud_1830	arsenite efflux ATP-binding protein ArsA (TC 3.A.4.1.1)	165
641594648	Daud_1834	hypothetical protein	200
641594653	Daud_1838	hypothetical protein	81
641594656	Daud_1841	hypothetical protein	130
641594658	Daud_1843	CBS domain containing protein	181
641594660	Daud_1845	hypothetical protein	224
641594662	Daud_1847	adenosylcobinamide-phosphate synthase (EC 6.3.1.10)	319
641594663	Daud_1848	adenosylcobyric acid synthase (glutamine-hydrolysing) (EC 6.3.5.10)	496
641594664	Daud_1849	L-threonine O-3-phosphate decarboxylase (EC 4.1.1.81)	346
641594666	Daud_1851	precorrin-3B C17-methyltransferase	220
641594667	Daud_1852	cobalamin (vitamin B12) biosynthesis CbiG protein	279
641594669	Daud_1854	precorrin-2 C20-methyltransferase (EC 2.1.1.130)/cobalt-factor II C20-methyltransferase (EC 2.1.1.151)	243
641594670	Daud_1855	precorrin-6Y C5,15-methyltransferase (decarboxylating) (EC 2.1.1.132)	216
641594671	Daud_1856	cobalt-precorrin 5B C1-methyltransferase (EC 2.1.1.195)	369
641594672	Daud_1857	cobalamin (vitamin B12) biosynthesis CbiX protein	159
641594674	Daud_1859	cobalt ABC transporter, inner membrane subunit CbiQ	257
641594675	Daud_1860	cobalt transport protein	96
641594678	Daud_1862	Integrase, catalytic region	442
641594681	Daud_1864	hypothetical protein	136
641594693	Daud_1875	hypothetical protein	91
641594696	Daud_1878	hypothetical protein	95
641594707	Daud_1889	dissimilatory adenylylsulfate reductase alpha subunit precursor (EC 1.8.99.2)	591
641594718	Daud_1900	transcriptional regulator, ArsR family	105
641594724	Daud_1906	hypothetical protein	111
641594726	Daud_1908	histidine kinase	772
641594728	Daud_1910	hypothetical protein	507
641594729	Daud_1911	DNA binding domain, excisionase family	216
641594733	Daud_1915	hypothetical protein	104
641594734	Daud_1916	4Fe-4S ferredoxin, iron-sulfur binding domain protein	236
641594735	Daud_1917	hypothetical protein	78
641594736	Daud_1918	hypothetical protein	86
641594737	Daud_1919	hypothetical protein	93
641594767	Daud_1950	diverged CheY-domain	108
641594769	Daud_1952	FeoA family protein	79
641594770	Daud_1953	FeoA family protein	80
641594778	Daud_1960	hypothetical protein	72
641594795	Daud_1974	hypothetical protein	117
641594796	Daud_1975	protein of unknown function DUF81	394
641594797	Daud_1976	hypothetical protein	64
641594798	Daud_1977	Transposase-like protein	555
641594805	Daud_1984	4Fe-4S ferredoxin, iron-sulfur binding domain protein	366
641594807	Daud_1986	Radical SAM domain protein	453
641594812	Daud_1990	hypothetical protein	119
641594813	Daud_1991	Radical SAM domain protein	294
641594815	Daud_1993	hypothetical protein	124
641594818	Daud_1996	methionine synthase (B12-independent) (EC 2.1.1.14)	754
641594819	Daud_1997	protein of unknown function DUF541	261
641594820	Daud_1998	Peptidoglycan-binding LysM	123
641594823	Daud_2001	hypothetical protein	294
641594825	Daud_2003	DNA polymerase III, epsilon subunit	247
641594826	Daud_2004	protein of unknown function DUF21	431
641594831	Daud_2009	hypothetical protein	65
641594832	Daud_2010	formate dehydrogenase family accessory protein FdhD	248
642485987	Daud_2022	hypothetical protein	74
641594847	Daud_2026	glutamate synthase (NADPH) GltB1 subunit (EC 1.4.1.13)	359
641594865	Daud_2044	hypothetical protein	76
641594872	Daud_2051	SSU ribosomal protein S21P	59
641594883	Daud_2062	LmbE family protein	288
641594884	Daud_2063	glycosyl transferase, group 1	392
641594917	Daud_2097	hypothetical protein	606
641594923	Daud_2103	hypothetical protein	583
641594925	Daud_2105	polysaccharide deacetylase	296
641594926	Daud_2106	PilT protein domain protein	152
641594927	Daud_2107	transcriptional regulator, AbrB family	80
641594928	Daud_2108	peptidase S8 and S53, subtilisin, kexin, sedolisin	995
642485989	Daud_2109	hypothetical protein	128
642485990	Daud_2110	hypothetical protein	60
641594929	Daud_2111	hypothetical protein	193
641594930	Daud_2112	hypothetical protein	104
641594931	Daud_2113	transcriptional regulator, AbrB family	87
641594933	Daud_2115	protein of unknown function UPF0150	82
641594935	Daud_2117	hypothetical protein	117
641594936	Daud_2118	hypothetical protein	106
641594937	Daud_2119	copper amine oxidase domain protein	429
641594939	Daud_2121	copper amine oxidase domain protein	704
641594940	Daud_2122	PilT protein domain protein	142
641594941	Daud_2123	putative transcriptional regulator, CopG family	102
641594942	Daud_2124	transcriptional modulator of MazE/toxin, MazF	130
641594945	Daud_2127	transcriptional regulator, AbrB family	90
641594946	Daud_2128	PilT protein domain protein	132
641594948	Daud_2130	PilT protein domain protein	150
641594949	Daud_2131	prevent-host-death family protein	102
641594975	Daud_2157	Rieske (2Fe-2S) domain protein	182
641595012	Daud_2194	transposase, IS4 family protein	443
641595058	Daud_2238	LSU ribosomal protein L34P	44
